# Supplementary material for: Bta-miR-223 Targeting CBLB Contributes to Resistance to Staphylococcus aureus Mastitis Through the PI3K/AKT/NF-κB Pathway
Source: Front Vet Sci. 2020 Aug 21;7:529. doi: 10.3389/fvets.2020.00529 (PMC7475710; doi:10.3389/fvets.2020.00529)
Supplement: Table S10 — Novel differentially expressed miRNAs in the two libraries. [file Table_10.XLS]

## Sheet: Sheet1
Table S10 Novel DE-miRNAs in the two libraries
MiRNA	S01	S02	S03	S04	S05	S06	Sequence	FDR	log2FC	regulated	sig-label
novel_13_147518	0.325473	0.367705	0.115236	1.24383	1.52568	1.45226	AUAACCUGAAUGAACUUUUUGG	0.00121	2.37	up	**
novel_15_199015	0.216982	0.857977	0.230471	1.92228	2.77396	1.93635	AAAUCCUGAAUGAACUUUUUGG	0.00102	2.29	up	**
novel_17_242275	13.6699	15.5662	12.4455	38.2194	47.9895	27.593	AAACCUGAAUGAACUUUUUGG	0.00191	1.43	up	**
novel_18_274486	0.216982	0.735409	0.115236	2.2615	1.94177	1.93635	AAUGCCUGAAUGAACUUUUUGG	0.000416	2.47	up	**
novel_19_298277	0	0.122568	0.115236	1.13075	3.05135	1.45226	AGGGUGUGGGUUUGGUCGUGGGA	0.00135	4.54	up	**
novel_1_22008	0.325473	0.367705	0.115236	10.4029	10.6797	6.77723	ACAACCUGAAUGAACUUUUUGG	0	5.08	up	**
novel_21_384514	0	0.122568	0.115236	1.01768	2.21917	1.12954	ACACCUGAACGAACUUUUUGG	0.000337	4.17	up	**
novel_23_411839	0.325473	0.367705	0.230471	1.24383	1.80307	1.45226	AUAACCUGAAUGAACUUUUUGG	0.00161	2.27	up	**
novel_23_424422	0.108491	0.122568	0.115236	1.01768	1.94177	1.12954	ACACUUGAAUGAACUUUUUGG	2.9e-05	3.55	up	**
novel_23_426794	0	0.122568	0.345707	1.69613	2.21917	3.22725	ACACCCGAAUGAACUUUUUGGC	5.3e-05	3.97	up	**
novel_26_470053	0.542455	0	0.345707	4.86223	5.68661	6.29314	CCGAGCCUGACAGAUCACACA	0	4.3	up	**
novel_26_470057	0	0.122568	0.230471	2.93995	2.91265	5.48633	UCGAGCCUGACAGAUCACACA	4.2e-05	5.04	up	**
novel_26_470065	0	0.122568	0.230471	2.93995	2.91265	5.48633	UCGAGCCUGACAGAUCACACA	4.2e-05	5.04	up	**
novel_2_320499	0	0.122568	0.115236	1.3569	2.08047	1.12954	GCACCUGAAUGAACUUUUUGG	1e-06	4.23	up	**
novel_5_605149	0.108491	0.735409	0.115236	1.69613	1.66437	1.93635	AAAGCCUGAAUAAACUUUUUGG	0.000675	2.41	up	**
novel_8_699901	0.108491	0.735409	0.115236	1.69613	1.66437	1.93635	AAAGCCUGAAUAAACUUUUUGG	0.000675	2.41	up	**
novel_9_734868	13.6699	15.4436	12.5607	38.4455	47.9895	27.2703	AAACCUGAAUGAACUUUUUGG	0.00191	1.43	up	**
novel_X_757522	12.8019	14.3405	12.0998	34.9402	47.4347	23.5589	AAACCUGAAUGAACUUUUUGG	0.00213	1.42	up	**
novel_X_761164	13.6699	15.5662	12.4455	38.2194	47.9895	27.593	AAACCUGAAUGAACUUUUUGG	0.00191	1.43	up	**
