# Supplementary material for: Bta-miR-223 Targeting CBLB Contributes to Resistance to Staphylococcus aureus Mastitis Through the PI3K/AKT/NF-κB Pathway
Source: Front Vet Sci. 2020 Aug 21;7:529. doi: 10.3389/fvets.2020.00529 (PMC7475710; doi:10.3389/fvets.2020.00529)
Supplement: Table S11 — KEGG annotation of the target genes of differentially expressed miRNAs. [file Table_11.XLS]

## Sheet: Sheet1
Table S11 KEGG annotation information of target genes of DE-miRNAs
Pathway	Pathway_id	Gene_number	Gene_id	KOs
Pathways in cancer	ko05200	99	ENSBTAG00000000602;ENSBTAG00000000738;ENSBTAG00000000753;ENSBTAG00000001002;ENSBTAG00000001221;ENSBTAG00000001341;ENSBTAG00000002107;ENSBTAG00000002350;ENSBTAG00000002940;ENSBTAG00000003060;ENSBTAG00000003061;ENSBTAG00000003075;ENSBTAG00000003147;ENSBTAG00000003397;ENSBTAG00000003971;ENSBTAG00000005111;ENSBTAG00000005339;ENSBTAG00000005978;ENSBTAG00000006631;ENSBTAG00000006640;ENSBTAG00000006894;…	K08525+K08803+K04706+K02620+K09348+K00444+K02432+K02649+K01558+K03176+K06240+K02353+K11217+K04496+K06620+K04662+K05448+K02649+K06230+K06618+K13241+K04467+K07209+K04706+K05717+K04377+K04496+K04358+K01357+K04707+K00572+K07299+K04490+K08015+K03173+K02353+K07860+K08528+K05635+K08527+K05090+K06237+K06226+K05061+K03174+K02677+K06237+K00445+K05093+K09389+K04359+K02375+K02085+K04362+K04371+K04498+K02157+…
MAPK signaling pathway	ko04010	77	ENSBTAG00000000317;ENSBTAG00000001014;ENSBTAG00000002036;ENSBTAG00000002211;ENSBTAG00000002297;ENSBTAG00000003016;ENSBTAG00000003060;ENSBTAG00000004114;ENSBTAG00000004953;ENSBTAG00000005700;ENSBTAG00000006251;ENSBTAG00000006366;ENSBTAG00000006998;ENSBTAG00000007084;ENSBTAG00000007547;ENSBTAG00000007591;ENSBTAG00000007599;ENSBTAG00000007882;ENSBTAG00000008151;ENSBTAG00000008409;ENSBTAG00000008623;…	K04434+K04464+K04862+K04436+K04865+K04458+K03176+K04419+K04376+K04417+K04347+K04446+K12363+K04466+K04866+K04467+K07209+K04849+K04421+K04377+K04358+K04859+K04352+K04854+K04425+K03173+K04432+K04850+K04459+K07860+K04437+K04378+K02677+K04416+K04459+K05093+K04345+K04359+K04344+K04391+K04362+K04348+K04853+K04371+K02308+K04380+K04418+K04456+K04372+K04446+K04367+K04403+K04458+K02580+K04459+K04423+K04441+…
Neuroactive ligand-receptor interaction	ko04080	69	ENSBTAG00000000376;ENSBTAG00000001242;ENSBTAG00000001388;ENSBTAG00000002606;ENSBTAG00000002891;ENSBTAG00000003544;ENSBTAG00000003691;ENSBTAG00000004048;ENSBTAG00000004908;ENSBTAG00000005052;ENSBTAG00000005236;ENSBTAG00000005299;ENSBTAG00000005527;ENSBTAG00000005800;ENSBTAG00000007052;ENSBTAG00000007175;ENSBTAG00000007496;ENSBTAG00000007897;ENSBTAG00000007996;ENSBTAG00000008027;ENSBTAG00000008672;…	K05217+K04141+K05223+K04309+K04161+K04295+K04212+K04320+K04817+K04582+K04195+K04198+K04580+K05197+K03915+K04226+K05216+K05228+K04162+K05242+K05184+K04163+K04232+K04203+K05203+K04238+K05266+K04240+K04265+K04129+K04239+K05205+K04308+K04264+K04809+K05268+K04608+K04258+K05204+K05438+K04615+K05237+K05269+K04143+K04241+K04581+K04812+K04137+K04009+K05262+K04223+K03916+K05212+K04174+K04276+K04151+K04236+…
Focal adhesion	ko04510	68	ENSBTAG00000000575;ENSBTAG00000000601;ENSBTAG00000000700;ENSBTAG00000001444;ENSBTAG00000001462;ENSBTAG00000002006;ENSBTAG00000002350;ENSBTAG00000003061;ENSBTAG00000004630;ENSBTAG00000005339;ENSBTAG00000005978;ENSBTAG00000008300;ENSBTAG00000008380;ENSBTAG00000008938;ENSBTAG00000009080;ENSBTAG00000010106;ENSBTAG00000010179;ENSBTAG00000011043;ENSBTAG00000011190;ENSBTAG00000011215;ENSBTAG00000011802;…	K06252+K06236+K06275+K06252+K05097+K04659+K02649+K06240+K04659+K05448+K02649+K05717+K06587+K05704+K06589+K10152+K06236+K07860+K04437+K05699+K06238+K05703+K05635+K05726+K06269+K03900+K03853+K06237+K06583+K06236+K02677+K06484+K06237+K05734+K04359+K06270+K00907+K00907+K06279+K04371+K06585+K10151+K06485+K06247+K04456+K06273+K05637+K06525+K05735+K02161+K06274+K06279+K02677+K06236+K06237+K06236+K04365+…
Calcium signaling pathway	ko04020	66	ENSBTAG00000000376;ENSBTAG00000001242;ENSBTAG00000001305;ENSBTAG00000001675;ENSBTAG00000002023;ENSBTAG00000002259;ENSBTAG00000002891;ENSBTAG00000005236;ENSBTAG00000005299;ENSBTAG00000006052;ENSBTAG00000006156;ENSBTAG00000006208;ENSBTAG00000006894;ENSBTAG00000006999;ENSBTAG00000007052;ENSBTAG00000007175;ENSBTAG00000007496;ENSBTAG00000007882;ENSBTAG00000007996;ENSBTAG00000008195;ENSBTAG00000008783;…	K05217+K04141+K05850+K00911+K13240+K10785+K04161+K04195+K04198+K05857+K01242+K08047+K13241+K04961+K03915+K04226+K05216+K04849+K04162+K00871+K04163+K08041+K05850+K04854+K04718+K05084+K04850+K05849+K04129+K05858+K04515+K02677+K04345+K05853+K00907+K04344+K00907+K04264+K04809+K04348+K04853+K04258+K05859+K13242+K04143+K08043+K05858+K04137+K04958+K04852+K02677+K04223+K03916+K05212+K04855+K10785+K05869+…
Endocytosis	ko04144	60	ENSBTAG00000000238;ENSBTAG00000000411;ENSBTAG00000000625;ENSBTAG00000000710;ENSBTAG00000001242;ENSBTAG00000001403;ENSBTAG00000001505;ENSBTAG00000001659;ENSBTAG00000002069;ENSBTAG00000003060;ENSBTAG00000003237;ENSBTAG00000003387;ENSBTAG00000003580;ENSBTAG00000003727;ENSBTAG00000004792;ENSBTAG00000004916;ENSBTAG00000005412;ENSBTAG00000005832;ENSBTAG00000006162;ENSBTAG00000007118;ENSBTAG00000007156;…	K12494+K12182+K04677+K00889+K04141+K06069+K08291+K12196+K06751+K03176+K12495+K13712+K12494+K12470+K12194+K12492+K13305+K00910+K12484+K04678+K12491+K05070+K08291+K12185+K12491+K12185+K05704+K04707+K12493+K11824+K05084+K12489+K12484+K05737+K12488+K12473+K04677+K05090+K01528+K12481+K05093+K01528+K12495+K05069+K12491+K12485+K12485+K12471+K04143+K12495+K12494+K11824+K00909+K06751+K06093+K04439+K05050+…
Cytokine-cytokine receptor interaction	ko04060	56	ENSBTAG00000000016;ENSBTAG00000000130;ENSBTAG00000001100;ENSBTAG00000001101;ENSBTAG00000001462;ENSBTAG00000001602;ENSBTAG00000002912;ENSBTAG00000004429;ENSBTAG00000005111;ENSBTAG00000005215;ENSBTAG00000005339;ENSBTAG00000006599;ENSBTAG00000007423;ENSBTAG00000007558;ENSBTAG00000007569;ENSBTAG00000007626;ENSBTAG00000007687;ENSBTAG00000008924;ENSBTAG00000009064;ENSBTAG00000010578;ENSBTAG00000011961;…	K05468+K05475+K05138+K05140+K05097+K05071+K04667+K04664+K04662+K05134+K05448+K04667+K05148+K05073+K05147+K05070+K04664+K05473+K04738+K05490+K05407+K05149+K05090+K05061+K04359+K05144+K04188+K04665+K05069+K05438+K05422+K04663+K04672+K04185+K04663+K05076+K05162+K05423+K05408+K12964+K03156+K05414+K05151+K05143+K05474+K04667+K05415+K05050+K04664+K05414+K05476+K05414+K05415+K04663+K05448+K05414
Wnt signaling pathway	ko04310	53	ENSBTAG00000000656;ENSBTAG00000001002;ENSBTAG00000001341;ENSBTAG00000002107;ENSBTAG00000002940;ENSBTAG00000003075;ENSBTAG00000003397;ENSBTAG00000005533;ENSBTAG00000005748;ENSBTAG00000005903;ENSBTAG00000005933;ENSBTAG00000006194;ENSBTAG00000006366;ENSBTAG00000006560;ENSBTAG00000008409;ENSBTAG00000008480;ENSBTAG00000009217;ENSBTAG00000009532;ENSBTAG00000010106;ENSBTAG00000010111;ENSBTAG00000010696;…	K04446+K02620+K00444+K02432+K01558+K02353+K04496+K11584+K04495+K03068+K04493+K04502+K04446+K04510+K04377+K04496+K01357+K00572+K10152+K04490+K02353+K07860+K05858+K04515+K02677+K03097+K00445+K02165+K04345+K02375+K02085+K04348+K04498+K02157+K10151+K04504+K04508+K04446+K02222+K05858+K02353+K11584+K01064+K02235+K02842+K02677+K02375+K04511+K02166+K04385+K03213+K02354+K04490
Regulation of actin cytoskeleton	ko04810	53	ENSBTAG00000000710;ENSBTAG00000002350;ENSBTAG00000003054;ENSBTAG00000005978;ENSBTAG00000006251;ENSBTAG00000007052;ENSBTAG00000007103;ENSBTAG00000008300;ENSBTAG00000008380;ENSBTAG00000008623;ENSBTAG00000008766;ENSBTAG00000009080;ENSBTAG00000010347;ENSBTAG00000011043;ENSBTAG00000011215;ENSBTAG00000011579;ENSBTAG00000012002;ENSBTAG00000012040;ENSBTAG00000012146;ENSBTAG00000012443;ENSBTAG00000012897;…	K00889+K02649+K05086+K02649+K04347+K03915+K05718+K05717+K06587+K04358+K05742+K06589+K08007+K07860+K05699+K04129+K05726+K05737+K06269+K05745+K06583+K06484+K05734+K05093+K04359+K06270+K00907+K00907+K04391+K02085+K04362+K05769+K05720+K04371+K06585+K06464+K06485+K06525+K05766+K12330+K05627+K05735+K04367+K07829+K03916+K04365+K05730+K05766+K05750+K05743+K04438+K05747+K02833
Axon guidance	ko04360	52	ENSBTAG00000000656;ENSBTAG00000000815;ENSBTAG00000001173;ENSBTAG00000001941;ENSBTAG00000002084;ENSBTAG00000002941;ENSBTAG00000003446;ENSBTAG00000004355;ENSBTAG00000004499;ENSBTAG00000004685;ENSBTAG00000004896;ENSBTAG00000004899;ENSBTAG00000005313;ENSBTAG00000006366;ENSBTAG00000007281;ENSBTAG00000008552;ENSBTAG00000009159;ENSBTAG00000009565;ENSBTAG00000010138;ENSBTAG00000010241;ENSBTAG00000011043;…	K04446+K05103+K06820+K06521+K07521+K07527+K05113+K06755+K07524+K07526+K07520+K07520+K05112+K04446+K06842+K06820+K06820+K04352+K06840+K07521+K07860+K06572+K05703+K07526+K06843+K06521+K06821+K05734+K07521+K07522+K06820+K06821+K05110+K05114+K07520+K04348+K04371+K06850+K04446+K07529+K06521+K06841+K05735+K05109+K06842+K06521+K06842+K05463+K05462+K05743+K06844+K02833
Chemokine signaling pathway	ko04062	45	ENSBTAG00000001505;ENSBTAG00000001778;ENSBTAG00000002350;ENSBTAG00000003762;ENSBTAG00000005464;ENSBTAG00000005832;ENSBTAG00000005978;ENSBTAG00000006208;ENSBTAG00000006251;ENSBTAG00000007591;ENSBTAG00000007599;ENSBTAG00000007981;ENSBTAG00000009087;ENSBTAG00000009520;ENSBTAG00000011043;ENSBTAG00000011234;ENSBTAG00000011961;ENSBTAG00000012002;ENSBTAG00000012510;ENSBTAG00000014367;ENSBTAG00000014798;…	K08291+K02581+K02649+K04539+K08046+K00910+K02649+K08047+K04347+K04467+K07209+K08291+K04545+K08041+K07860+K09408+K05407+K05726+K05858+K04345+K04188+K06279+K04371+K04734+K04456+K08043+K08045+K05858+K04185+K06279+K00909+K05854+K02580+K08822+K11218+K02677+K04365+K05408+K12964+K05730+K04439+K05050+K04438+K05747+K02833
Jak-STAT signaling pathway	ko04630	40	ENSBTAG00000000753;ENSBTAG00000001100;ENSBTAG00000001101;ENSBTAG00000001602;ENSBTAG00000002350;ENSBTAG00000003147;ENSBTAG00000004386;ENSBTAG00000005215;ENSBTAG00000005816;ENSBTAG00000005978;ENSBTAG00000007558;ENSBTAG00000007626;ENSBTAG00000007833;ENSBTAG00000008250;ENSBTAG00000008409;ENSBTAG00000008535;ENSBTAG00000009064;ENSBTAG00000009494;ENSBTAG00000010106;ENSBTAG00000011698;ENSBTAG00000013334;…	K04706+K05138+K05140+K05071+K02649+K11217+K04694+K05134+K04693+K02649+K05073+K05070+K04706+K04704+K04377+K04699+K04738+K04707+K10152+K11219+K05061+K04498+K05069+K10151+K05438+K04456+K04703+K05422+K05076+K05697+K11218+K05423+K04706+K04697+K05414+K05415+K05414+K05414+K05415+K05414
ECM-receptor interaction	ko04512	39	ENSBTAG00000000575;ENSBTAG00000000601;ENSBTAG00000001444;ENSBTAG00000001599;ENSBTAG00000002006;ENSBTAG00000003061;ENSBTAG00000004630;ENSBTAG00000008300;ENSBTAG00000008380;ENSBTAG00000009080;ENSBTAG00000010179;ENSBTAG00000011154;ENSBTAG00000011580;ENSBTAG00000011802;ENSBTAG00000011966;ENSBTAG00000012265;ENSBTAG00000012849;ENSBTAG00000012897;ENSBTAG00000013155;ENSBTAG00000013203;ENSBTAG00000013745;…	K06252+K06236+K06252+K06258+K04659+K06240+K04659+K05717+K06587+K06589+K06236+K06257+K06265+K06238+K05635+K03900+K06237+K06583+K06236+K06260+K06484+K06237+K06263+K06585+K06255+K06485+K06247+K05637+K06525+K06236+K06237+K06236+K06243+K06237+K06236+K06240+K06238+K06245+K06262
Neurotrophin signaling pathway	ko04722	38	ENSBTAG00000001014;ENSBTAG00000001778;ENSBTAG00000002350;ENSBTAG00000003060;ENSBTAG00000005978;ENSBTAG00000006193;ENSBTAG00000006535;ENSBTAG00000007599;ENSBTAG00000008151;ENSBTAG00000008733;ENSBTAG00000008849;ENSBTAG00000009101;ENSBTAG00000009691;ENSBTAG00000011213;ENSBTAG00000011234;ENSBTAG00000011631;ENSBTAG00000012653;ENSBTAG00000013353;ENSBTAG00000013790;ENSBTAG00000015271;ENSBTAG00000016072;…	K04464+K02581+K02649+K03176+K02649+K04731+K07187+K07209+K04421+K12464+K12388+K12459+K07193+K05101+K09408+K06630+K04515+K12458+K04416+K08846+K06279+K04730+K04371+K04734+K12077+K05859+K04456+K02161+K06279+K02580+K04441+K07187+K04365+K06630+K05869+K04445+K04438+K02833
Insulin signaling pathway	ko04910	38	ENSBTAG00000000253;ENSBTAG00000001403;ENSBTAG00000002350;ENSBTAG00000002883;ENSBTAG00000004386;ENSBTAG00000005218;ENSBTAG00000005978;ENSBTAG00000006535;ENSBTAG00000007599;ENSBTAG00000007884;ENSBTAG00000008195;ENSBTAG00000009175;ENSBTAG00000009494;ENSBTAG00000009691;ENSBTAG00000010073;ENSBTAG00000011934;ENSBTAG00000012146;ENSBTAG00000013108;ENSBTAG00000014205;ENSBTAG00000014367;ENSBTAG00000014898;…	K05695+K06069+K02649+K07204+K04694+K13296+K02649+K07187+K07209+K07197+K00871+K04688+K04707+K07193+K07192+K01596+K06269+K00844+K04739+K04345+K00844+K04739+K00665+K06279+K04371+K12406+K04456+K04372+K06279+K07207+K07187+K04365+K04697+K12407+K07201+K04438+K04739+K02833
Melanogenesis	ko04916	38	ENSBTAG00000001002;ENSBTAG00000001341;ENSBTAG00000002107;ENSBTAG00000002300;ENSBTAG00000002940;ENSBTAG00000003075;ENSBTAG00000005299;ENSBTAG00000005464;ENSBTAG00000006143;ENSBTAG00000006208;ENSBTAG00000007897;ENSBTAG00000009217;ENSBTAG00000009520;ENSBTAG00000009532;ENSBTAG00000010111;ENSBTAG00000010215;ENSBTAG00000010696;ENSBTAG00000012510;ENSBTAG00000012653;ENSBTAG00000013550;ENSBTAG00000013990;…	K02620+K00444+K02432+K01827+K01558+K02353+K04198+K08046+K09048+K08047+K05228+K01357+K08041+K00572+K04490+K09048+K02353+K05858+K04515+K02677+K00445+K04345+K02375+K09048+K04371+K04498+K08043+K08045+K05858+K02353+K01064+K02235+K02842+K02677+K02375+K02354+K02833+K04490
Natural killer cell mediated cytotoxicity	ko04650	37	ENSBTAG00000000656;ENSBTAG00000001008;ENSBTAG00000002069;ENSBTAG00000002350;ENSBTAG00000005892;ENSBTAG00000005978;ENSBTAG00000006366;ENSBTAG00000007103;ENSBTAG00000010303;ENSBTAG00000011043;ENSBTAG00000011851;ENSBTAG00000013550;ENSBTAG00000013996;ENSBTAG00000016005;ENSBTAG00000016072;ENSBTAG00000016156;ENSBTAG00000017060;ENSBTAG00000017584;ENSBTAG00000018270;ENSBTAG00000019838;ENSBTAG00000020116;…	K04446+K07818+K06751+K02649+K07360+K02649+K04446+K05718+K06490+K07860+K05703+K02677+K07984+K04348+K06279+K04371+K06464+K05859+K04446+K06279+K06751+K05697+K02677+K07362+K04365+K07986+K07983+K03156+K05414+K05730+K05415+K05414+K07980+K05414+K05415+K02833+K05414
Hepatitis C	ko05160	37	ENSBTAG00000000753;ENSBTAG00000002350;ENSBTAG00000003147;ENSBTAG00000005816;ENSBTAG00000005978;ENSBTAG00000007591;ENSBTAG00000007599;ENSBTAG00000007833;ENSBTAG00000010408;ENSBTAG00000010497;ENSBTAG00000010681;ENSBTAG00000011698;ENSBTAG00000012314;ENSBTAG00000012642;ENSBTAG00000013475;ENSBTAG00000013545;ENSBTAG00000014351;ENSBTAG00000016156;ENSBTAG00000016683;ENSBTAG00000016836;ENSBTAG00000017381;…	K04706+K02649+K11217+K04693+K02649+K04467+K07209+K04706+K07211+K03173+K08536+K11219+K12473+K03171+K03174+K12648+K08860+K04371+K04734+K12077+K06087+K04456+K02580+K04441+K04706+K04365+K03156+K05414+K06087+K05415+K05414+K06087+K05414+K05415+K02833+K09447+K05414
Osteoclast differentiation	ko04380	36	ENSBTAG00000002350;ENSBTAG00000002922;ENSBTAG00000003147;ENSBTAG00000003895;ENSBTAG00000004386;ENSBTAG00000005816;ENSBTAG00000005841;ENSBTAG00000005978;ENSBTAG00000006194;ENSBTAG00000007084;ENSBTAG00000007423;ENSBTAG00000007569;ENSBTAG00000007591;ENSBTAG00000007599;ENSBTAG00000008004;ENSBTAG00000008924;ENSBTAG00000010497;ENSBTAG00000011698;ENSBTAG00000011851;ENSBTAG00000012046;ENSBTAG00000012771;…	K02649+K08091+K11217+K08009+K04694+K04693+K06512+K02649+K04502+K04466+K05148+K05147+K04467+K07209+K08010+K05473+K03173+K11219+K05703+K09028+K05090+K04348+K04371+K04734+K04456+K06512+K06512+K04403+K02580+K04441+K03156+K05415+K05869+K09253+K05415+K06512
Protein processing in endoplasmic reticulum	ko04141	34	ENSBTAG00000000428;ENSBTAG00000001548;ENSBTAG00000001844;ENSBTAG00000002791;ENSBTAG00000003069;ENSBTAG00000003619;ENSBTAG00000003793;ENSBTAG00000005191;ENSBTAG00000005355;ENSBTAG00000006533;ENSBTAG00000007223;ENSBTAG00000008034;ENSBTAG00000010401;ENSBTAG00000010497;ENSBTAG00000011913;ENSBTAG00000012778;ENSBTAG00000012904;ENSBTAG00000013651;ENSBTAG00000014351;ENSBTAG00000015438;ENSBTAG00000016874;…	K14021+K04523+K01228+K14007+K01230+K14007+K01456+K12666+K09556+K14012+K10099+K10082+K10597+K03173+K13999+K03853+K10084+K09518+K08860+K14000+K09507+K05546+K09582+K14006+K04556+K13984+K05638+K02161+K13989+K10081+K01230+K10666+K14020+K13984
Purine metabolism	ko00230	33	ENSBTAG00000000077;ENSBTAG00000000445;ENSBTAG00000000494;ENSBTAG00000000590;ENSBTAG00000000639;ENSBTAG00000002983;ENSBTAG00000003025;ENSBTAG00000005218;ENSBTAG00000005270;ENSBTAG00000005280;ENSBTAG00000005464;ENSBTAG00000006208;ENSBTAG00000006234;ENSBTAG00000006481;ENSBTAG00000006768;ENSBTAG00000008773;ENSBTAG00000009520;ENSBTAG00000011083;ENSBTAG00000011527;ENSBTAG00000012032;ENSBTAG00000012241;…	K01756+K13757+K01120+K02324+K00759+K01081+K00940+K13296+K01081+K01488+K08046+K08047+K12323+K02999+K12305+K12321+K08041+K02327+K01081+K01120+K02328+K01490+K00940+K12406+K13756+K01939+K03505+K14721+K08043+K08045+K12321+K01081+K12318
Small cell lung cancer	ko05222	33	ENSBTAG00000000602;ENSBTAG00000000753;ENSBTAG00000002350;ENSBTAG00000003061;ENSBTAG00000003971;ENSBTAG00000005978;ENSBTAG00000006640;ENSBTAG00000006894;ENSBTAG00000007591;ENSBTAG00000007599;ENSBTAG00000007833;ENSBTAG00000008300;ENSBTAG00000008409;ENSBTAG00000010497;ENSBTAG00000011518;ENSBTAG00000011966;ENSBTAG00000012849;ENSBTAG00000013475;ENSBTAG00000013760;ENSBTAG00000014400;ENSBTAG00000016683;…	K08525+K04706+K02649+K06240+K06620+K02649+K06618+K13241+K04467+K07209+K04706+K05717+K04377+K03173+K08528+K05635+K06237+K03174+K06237+K09389+K04734+K08526+K06485+K06247+K04456+K05637+K02161+K02580+K06237+K04706+K06243+K06237+K06240
Vascular smooth muscle contraction	ko04270	32	ENSBTAG00000005464;ENSBTAG00000006208;ENSBTAG00000006234;ENSBTAG00000007175;ENSBTAG00000008027;ENSBTAG00000009520;ENSBTAG00000010660;ENSBTAG00000011534;ENSBTAG00000011772;ENSBTAG00000012146;ENSBTAG00000012361;ENSBTAG00000012510;ENSBTAG00000013300;ENSBTAG00000013550;ENSBTAG00000014367;ENSBTAG00000014609;ENSBTAG00000014818;ENSBTAG00000014930;ENSBTAG00000016097;ENSBTAG00000016156;ENSBTAG00000018705;…	K08046+K08047+K12323+K04226+K05242+K08041+K04850+K08447+K12329+K06269+K12331+K05858+K04936+K02677+K04345+K06270+K00907+K00907+K04853+K04371+K08043+K08045+K12330+K05858+K04137+K04958+K02677+K12335+K04365+K04136+K12318+K04857
TGF-beta signaling pathway	ko04350	32	ENSBTAG00000000625;ENSBTAG00000002006;ENSBTAG00000002878;ENSBTAG00000002912;ENSBTAG00000003021;ENSBTAG00000004429;ENSBTAG00000004630;ENSBTAG00000005111;ENSBTAG00000006599;ENSBTAG00000007118;ENSBTAG00000007589;ENSBTAG00000007687;ENSBTAG00000008409;ENSBTAG00000009175;ENSBTAG00000012063;ENSBTAG00000012441;ENSBTAG00000013090;ENSBTAG00000014955;ENSBTAG00000016156;ENSBTAG00000016169;ENSBTAG00000016198;…	K04677+K04659+K04657+K04667+K04684+K04664+K04659+K04662+K04667+K04678+K04676+K04664+K04377+K04688+K04682+K04677+K04666+K04665+K04371+K04680+K04498+K04681+K04663+K04672+K04663+K04683+K08023+K03156+K04667+K04664+K04658+K04663
T cell receptor signaling pathway	ko04660	32	ENSBTAG00000000656;ENSBTAG00000001778;ENSBTAG00000002259;ENSBTAG00000002350;ENSBTAG00000005892;ENSBTAG00000005978;ENSBTAG00000006366;ENSBTAG00000007084;ENSBTAG00000007591;ENSBTAG00000007599;ENSBTAG00000009494;ENSBTAG00000011851;ENSBTAG00000013851;ENSBTAG00000013958;ENSBTAG00000014698;ENSBTAG00000015710;ENSBTAG00000016005;ENSBTAG00000016156;ENSBTAG00000016683;ENSBTAG00000016836;ENSBTAG00000017636;…	K04446+K02581+K10785+K02649+K07360+K02649+K04446+K04466+K04467+K07209+K04707+K05703+K07368+K05734+K07367+K06451+K04348+K04371+K04734+K12077+K04456+K04446+K05735+K02580+K05697+K04441+K07362+K03156+K07369+K05730+K10785+K02833
Toxoplasmosis	ko05145	32	ENSBTAG00000000563;ENSBTAG00000001778;ENSBTAG00000002350;ENSBTAG00000003061;ENSBTAG00000003147;ENSBTAG00000004386;ENSBTAG00000005215;ENSBTAG00000005978;ENSBTAG00000006894;ENSBTAG00000007591;ENSBTAG00000007599;ENSBTAG00000010576;ENSBTAG00000011698;ENSBTAG00000011966;ENSBTAG00000012314;ENSBTAG00000016085;ENSBTAG00000016156;ENSBTAG00000016683;ENSBTAG00000016836;ENSBTAG00000017266;ENSBTAG00000017473;…	K04729+K02581+K02649+K06240+K11217+K04694+K05134+K02649+K13241+K04467+K07209+K04432+K11219+K05635+K12473+K04730+K04371+K04734+K12077+K06485+K06247+K04456+K05637+K02161+K04403+K02580+K00461+K08060+K04441+K06243+K03156+K06240
Amoebiasis	ko05146	32	ENSBTAG00000000601;ENSBTAG00000002350;ENSBTAG00000003061;ENSBTAG00000005978;ENSBTAG00000006894;ENSBTAG00000008300;ENSBTAG00000009520;ENSBTAG00000010179;ENSBTAG00000010520;ENSBTAG00000011215;ENSBTAG00000011966;ENSBTAG00000012510;ENSBTAG00000012849;ENSBTAG00000013155;ENSBTAG00000013550;ENSBTAG00000013760;ENSBTAG00000014367;ENSBTAG00000015032;ENSBTAG00000017060;ENSBTAG00000017473;ENSBTAG00000018160;…	K06236+K02649+K06240+K02649+K13241+K05717+K08041+K06236+K03999+K05699+K05635+K05858+K06237+K06236+K02677+K06237+K04345+K04391+K06464+K06247+K05637+K05858+K02580+K02677+K06236+K06237+K06236+K06243+K06237+K03156+K06236+K06240
Cell adhesion molecules (CAMs)	ko04514	31	ENSBTAG00000000244;ENSBTAG00000000253;ENSBTAG00000000977;ENSBTAG00000002069;ENSBTAG00000002259;ENSBTAG00000002303;ENSBTAG00000003176;ENSBTAG00000003217;ENSBTAG00000007103;ENSBTAG00000007708;ENSBTAG00000008114;ENSBTAG00000010303;ENSBTAG00000011154;ENSBTAG00000011530;ENSBTAG00000011887;ENSBTAG00000014645;ENSBTAG00000015058;ENSBTAG00000015742;ENSBTAG00000016566;ENSBTAG00000017044;ENSBTAG00000017060;…	K07377+K05695+K06781+K06751+K10785+K06816+K06785+K06780+K05718+K07378+K06520+K06490+K06257+K06809+K06467+K06760+K06797+K06486+K06585+K06771+K06464+K06485+K06087+K06456+K06751+K07378+K07377+K06087+K07378+K10785+K06087
Salivary secretion	ko04970	31	ENSBTAG00000001242;ENSBTAG00000001305;ENSBTAG00000002023;ENSBTAG00000005464;ENSBTAG00000006156;ENSBTAG00000006208;ENSBTAG00000008274;ENSBTAG00000008766;ENSBTAG00000009520;ENSBTAG00000009552;ENSBTAG00000011226;ENSBTAG00000012510;ENSBTAG00000012780;ENSBTAG00000013300;ENSBTAG00000013550;ENSBTAG00000013680;ENSBTAG00000014367;ENSBTAG00000017981;ENSBTAG00000018635;ENSBTAG00000018705;ENSBTAG00000018777;…	K04141+K05850+K13240+K08046+K01242+K08047+K13908+K05742+K08041+K05850+K13855+K05858+K12550+K04936+K02677+K01540+K04345+K04143+K01539+K08043+K08045+K05858+K04137+K04958+K02677+K13912+K13879+K09867+K13911+K04136+K12318
Alzheimer's disease	ko05010	31	ENSBTAG00000000394;ENSBTAG00000001423;ENSBTAG00000002023;ENSBTAG00000003279;ENSBTAG00000007812;ENSBTAG00000009534;ENSBTAG00000010123;ENSBTAG00000010660;ENSBTAG00000012510;ENSBTAG00000012634;ENSBTAG00000012778;ENSBTAG00000014806;ENSBTAG00000015655;ENSBTAG00000016005;ENSBTAG00000016097;ENSBTAG00000016156;ENSBTAG00000017512;ENSBTAG00000018188;ENSBTAG00000018274;ENSBTAG00000018554;ENSBTAG00000019079;…	K07747+K03964+K13240+K03954+K11353+K03966+K04524+K04850+K05858+K03963+K03853+K05853+K04529+K04348+K04853+K04371+K04380+K03968+K02373+K00134+K05858+K00414+K03940+K03965+K04958+K03942+K05212+K03156+K05211+K00234+K04857
Huntington's disease	ko05016	31	ENSBTAG00000000781;ENSBTAG00000001423;ENSBTAG00000001506;ENSBTAG00000003021;ENSBTAG00000003279;ENSBTAG00000004257;ENSBTAG00000005787;ENSBTAG00000006143;ENSBTAG00000007812;ENSBTAG00000008538;ENSBTAG00000008605;ENSBTAG00000009534;ENSBTAG00000009915;ENSBTAG00000010215;ENSBTAG00000012510;ENSBTAG00000012634;ENSBTAG00000015802;ENSBTAG00000016198;ENSBTAG00000016732;ENSBTAG00000018188;ENSBTAG00000019079;…	K04559+K03964+K04533+K04684+K03954+K03129+K04638+K09048+K11353+K10409+K10408+K03966+K11824+K09048+K05858+K03963+K09048+K04498+K11143+K03968+K05858+K00414+K11824+K09222+K03940+K03965+K04958+K03942+K04604+K00234+K04604
Protein digestion and absorption	ko04974	30	ENSBTAG00000000601;ENSBTAG00000004629;ENSBTAG00000010082;ENSBTAG00000010179;ENSBTAG00000010856;ENSBTAG00000011112;ENSBTAG00000011802;ENSBTAG00000011873;ENSBTAG00000012849;ENSBTAG00000013155;ENSBTAG00000013240;ENSBTAG00000013577;ENSBTAG00000013680;ENSBTAG00000013760;ENSBTAG00000014761;ENSBTAG00000015581;ENSBTAG00000018635;ENSBTAG00000019517;ENSBTAG00000020622;ENSBTAG00000021217;ENSBTAG00000021310;…	K06236+K12040+K08135+K06236+K05849+K04916+K06238+K04897+K06237+K06236+K06519+K05616+K01540+K06237+K06002+K08131+K01539+K14211+K08131+K06236+K06237+K06236+K06823+K06237+K06236+K06238+K01285+K09708+K08131+K04926
Tight junction	ko04530	29	ENSBTAG00000001009;ENSBTAG00000001403;ENSBTAG00000002580;ENSBTAG00000003176;ENSBTAG00000003512;ENSBTAG00000008938;ENSBTAG00000009663;ENSBTAG00000009703;ENSBTAG00000011189;ENSBTAG00000011215;ENSBTAG00000011767;ENSBTAG00000011770;ENSBTAG00000011803;ENSBTAG00000013550;ENSBTAG00000013784;ENSBTAG00000017381;ENSBTAG00000017564;ENSBTAG00000017636;ENSBTAG00000018945;ENSBTAG00000019251;ENSBTAG00000019611;…	K06106+K06069+K10352+K06785+K10352+K05704+K06099+K10352+K06105+K05699+K06091+K06098+K10352+K02677+K03097+K06087+K06102+K04456+K06104+K06107+K06112+K06094+K02677+K07829+K06093+K10352+K06087+K06087+K02833
Toll-like receptor signaling pathway	ko04620	29	ENSBTAG00000000563;ENSBTAG00000002350;ENSBTAG00000002357;ENSBTAG00000005978;ENSBTAG00000007591;ENSBTAG00000007599;ENSBTAG00000008237;ENSBTAG00000010408;ENSBTAG00000010576;ENSBTAG00000013475;ENSBTAG00000015032;ENSBTAG00000016085;ENSBTAG00000016156;ENSBTAG00000016683;ENSBTAG00000016864;ENSBTAG00000017636;ENSBTAG00000018198;ENSBTAG00000018274;ENSBTAG00000019828;ENSBTAG00000020270;ENSBTAG00000020783;…	K04729+K02649+K05409+K02649+K04467+K07209+K05402+K07211+K04432+K03174+K04391+K04730+K04371+K04734+K05399+K04456+K10161+K02373+K04403+K02580+K04441+K03156+K05414+K05415+K05414+K05414+K05415+K09447+K05414
Dilated cardiomyopathy	ko05414	29	ENSBTAG00000001242;ENSBTAG00000002036;ENSBTAG00000002297;ENSBTAG00000005464;ENSBTAG00000006208;ENSBTAG00000007547;ENSBTAG00000008380;ENSBTAG00000009080;ENSBTAG00000009489;ENSBTAG00000009520;ENSBTAG00000010660;ENSBTAG00000011580;ENSBTAG00000012897;ENSBTAG00000013745;ENSBTAG00000014367;ENSBTAG00000016097;ENSBTAG00000016566;ENSBTAG00000017266;ENSBTAG00000017574;ENSBTAG00000018169;ENSBTAG00000018705;…	K04141+K04862+K04865+K08046+K08047+K04866+K06587+K06589+K04859+K08041+K04850+K06265+K06583+K06484+K04345+K04853+K06585+K06485+K12641+K06525+K08043+K08045+K04871+K12568+K04864+K04861+K04863+K03156+K04857
Cell cycle	ko04110	28	ENSBTAG00000001937;ENSBTAG00000002474;ENSBTAG00000002719;ENSBTAG00000003971;ENSBTAG00000005269;ENSBTAG00000005278;ENSBTAG00000006640;ENSBTAG00000007303;ENSBTAG00000008409;ENSBTAG00000009223;ENSBTAG00000010106;ENSBTAG00000011631;ENSBTAG00000012063;ENSBTAG00000012184;ENSBTAG00000014400;ENSBTAG00000014453;ENSBTAG00000016198;ENSBTAG00000016243;ENSBTAG00000016649;ENSBTAG00000017019;ENSBTAG00000018730;…	K03358+K06638+K02603+K06620+K05868+K06632+K06618+K06670+K04377+K06644+K10152+K06630+K04682+K06635+K09389+K06631+K04498+K04681+K10151+K06642+K10500+K04683+K02210+K06630+K06621+K03349+K02212+K06635
Ubiquitin mediated proteolysis	ko04120	28	ENSBTAG00000000753;ENSBTAG00000001937;ENSBTAG00000004386;ENSBTAG00000005412;ENSBTAG00000007118;ENSBTAG00000007223;ENSBTAG00000007515;ENSBTAG00000007833;ENSBTAG00000009494;ENSBTAG00000010401;ENSBTAG00000012087;ENSBTAG00000012335;ENSBTAG00000012744;ENSBTAG00000013790;ENSBTAG00000013916;ENSBTAG00000014366;ENSBTAG00000016746;ENSBTAG00000017155;ENSBTAG00000018802;ENSBTAG00000018996;ENSBTAG00000018999;…	K04706+K03358+K04694+K13305+K04678+K10099+K10582+K04706+K04707+K10597+K10602+K10698+K10579+K04416+K10595+K10599+K06688+K10607+K10585+K04556+K10604+K10610+K10570+K04706+K10603+K10143+K07868+K03349
Arrhythmogenic right ventricular cardiomyopathy (ARVC)	ko05412	28	ENSBTAG00000001002;ENSBTAG00000001835;ENSBTAG00000002036;ENSBTAG00000002297;ENSBTAG00000002651;ENSBTAG00000007547;ENSBTAG00000008380;ENSBTAG00000009080;ENSBTAG00000009489;ENSBTAG00000010111;ENSBTAG00000010660;ENSBTAG00000011215;ENSBTAG00000011580;ENSBTAG00000012897;ENSBTAG00000013745;ENSBTAG00000016097;ENSBTAG00000016566;ENSBTAG00000017266;ENSBTAG00000017574;ENSBTAG00000017685;ENSBTAG00000018169;…	K02620+K07372+K04862+K04865+K12642+K04866+K06587+K06589+K04859+K04490+K04850+K05699+K06265+K06583+K06484+K04853+K06585+K06485+K12641+K10056+K06525+K04871+K04864+K07597+K04861+K04863+K04490+K04857
Lysosome	ko04142	27	ENSBTAG00000001189;ENSBTAG00000002402;ENSBTAG00000005592;ENSBTAG00000005674;ENSBTAG00000006768;ENSBTAG00000006780;ENSBTAG00000007512;ENSBTAG00000007896;ENSBTAG00000008464;ENSBTAG00000008495;ENSBTAG00000008849;ENSBTAG00000009034;ENSBTAG00000010242;ENSBTAG00000010637;ENSBTAG00000011063;ENSBTAG00000011100;ENSBTAG00000012117;ENSBTAG00000014118;ENSBTAG00000015195;ENSBTAG00000015512;ENSBTAG00000015628;…	K12392+K06564+K04992+K01186+K12305+K08565+K06129+K01125+K05656+K12397+K12388+K12396+K06528+K12381+K01374+K01275+K03662+K10087+K12385+K12373+K12350+K12404+K08568+K13289+K13444+K05642+K01205
Phagosome	ko04145	27	ENSBTAG00000000411;ENSBTAG00000002006;ENSBTAG00000002023;ENSBTAG00000002069;ENSBTAG00000003037;ENSBTAG00000003038;ENSBTAG00000003895;ENSBTAG00000004093;ENSBTAG00000004630;ENSBTAG00000007312;ENSBTAG00000007705;ENSBTAG00000007712;ENSBTAG00000008004;ENSBTAG00000008953;ENSBTAG00000010242;ENSBTAG00000012117;ENSBTAG00000013745;ENSBTAG00000014700;ENSBTAG00000015032;ENSBTAG00000015739;ENSBTAG00000017060;…	K12182+K04659+K13240+K06751+K05654+K05654+K08009+K07375+K04659+K06563+K10062+K08517+K08010+K05653+K06528+K03662+K06484+K10416+K04391+K06560+K06464+K06751+K07375+K07375+K13883+K07375+K07375
Apoptosis	ko04210	27	ENSBTAG00000000563;ENSBTAG00000002350;ENSBTAG00000003060;ENSBTAG00000005978;ENSBTAG00000006193;ENSBTAG00000007084;ENSBTAG00000007591;ENSBTAG00000007599;ENSBTAG00000009064;ENSBTAG00000010497;ENSBTAG00000012484;ENSBTAG00000012642;ENSBTAG00000012778;ENSBTAG00000014205;ENSBTAG00000014367;ENSBTAG00000014958;ENSBTAG00000016005;ENSBTAG00000016085;ENSBTAG00000016683;ENSBTAG00000017636;ENSBTAG00000018274;…	K04729+K02649+K03176+K02649+K04731+K04466+K04467+K07209+K04738+K03173+K01173+K03171+K03853+K04739+K04345+K04739+K04348+K04730+K04734+K04456+K02373+K02161+K02311+K02580+K01173+K03156+K04739
RIG-I-like receptor signaling pathway	ko04622	27	ENSBTAG00000001778;ENSBTAG00000003113;ENSBTAG00000007591;ENSBTAG00000007599;ENSBTAG00000009948;ENSBTAG00000010408;ENSBTAG00000010497;ENSBTAG00000011280;ENSBTAG00000012642;ENSBTAG00000013475;ENSBTAG00000013545;ENSBTAG00000013790;ENSBTAG00000016683;ENSBTAG00000016988;ENSBTAG00000018201;ENSBTAG00000018274;ENSBTAG00000020270;ENSBTAG00000020783;ENSBTAG00000025471;ENSBTAG00000025928;ENSBTAG00000033695;…	K02581+K12170+K04467+K07209+K10652+K07211+K03173+K12652+K03171+K03174+K12648+K04416+K04734+K09578+K00863+K02373+K02580+K04441+K03156+K05414+K05415+K05414+K05414+K05415+K12649+K09447+K05414
Leukocyte transendothelial migration	ko04670	27	ENSBTAG00000002350;ENSBTAG00000003176;ENSBTAG00000003895;ENSBTAG00000005978;ENSBTAG00000006828;ENSBTAG00000007103;ENSBTAG00000008004;ENSBTAG00000008114;ENSBTAG00000010303;ENSBTAG00000010347;ENSBTAG00000010427;ENSBTAG00000011043;ENSBTAG00000011215;ENSBTAG00000012002;ENSBTAG00000013550;ENSBTAG00000013884;ENSBTAG00000017060;ENSBTAG00000017381;ENSBTAG00000017584;ENSBTAG00000019267;ENSBTAG00000019604;…	K02649+K06785+K08009+K02649+K08014+K05718+K08010+K06520+K06490+K08007+K08015+K07860+K05699+K05726+K02677+K08013+K06464+K06087+K05859+K01398+K06274+K01403+K04441+K02677+K06087+K05730+K06087
Chagas disease (American trypanosomiasis)	ko05142	27	ENSBTAG00000000563;ENSBTAG00000002259;ENSBTAG00000002350;ENSBTAG00000005978;ENSBTAG00000006894;ENSBTAG00000007153;ENSBTAG00000007591;ENSBTAG00000007599;ENSBTAG00000009520;ENSBTAG00000011193;ENSBTAG00000012510;ENSBTAG00000015710;ENSBTAG00000016085;ENSBTAG00000016156;ENSBTAG00000016683;ENSBTAG00000017636;ENSBTAG00000018198;ENSBTAG00000018274;ENSBTAG00000019079;ENSBTAG00000020270;ENSBTAG00000020783;…	K04729+K10785+K02649+K02649+K13241+K03986+K04467+K07209+K08041+K03988+K05858+K06451+K04730+K04371+K04734+K04456+K10161+K02373+K05858+K02580+K04441+K03916+K05408+K03156+K05415+K10785+K05415
Prostate cancer	ko05215	27	ENSBTAG00000001002;ENSBTAG00000001221;ENSBTAG00000002350;ENSBTAG00000003054;ENSBTAG00000003971;ENSBTAG00000005978;ENSBTAG00000006143;ENSBTAG00000006640;ENSBTAG00000007591;ENSBTAG00000007599;ENSBTAG00000010111;ENSBTAG00000010215;ENSBTAG00000014064;ENSBTAG00000014400;ENSBTAG00000014541;ENSBTAG00000015457;ENSBTAG00000015802;ENSBTAG00000016156;ENSBTAG00000016198;ENSBTAG00000016683;ENSBTAG00000017636;…	K02620+K09348+K02649+K05086+K06620+K02649+K09048+K06618+K04467+K07209+K04490+K09048+K05093+K09389+K04359+K04362+K09048+K04371+K04498+K04734+K04456+K02161+K02580+K04365+K07201+K02833+K04490
Basal cell carcinoma	ko05217	27	ENSBTAG00000001002;ENSBTAG00000001341;ENSBTAG00000002107;ENSBTAG00000002940;ENSBTAG00000003075;ENSBTAG00000005111;ENSBTAG00000006631;ENSBTAG00000009217;ENSBTAG00000009532;ENSBTAG00000010111;ENSBTAG00000010696;ENSBTAG00000013287;ENSBTAG00000013990;ENSBTAG00000015072;ENSBTAG00000015433;ENSBTAG00000016577;ENSBTAG00000019336;ENSBTAG00000020267;ENSBTAG00000020590;ENSBTAG00000020742;ENSBTAG00000020957;…	K02620+K00444+K02432+K01558+K02353+K04662+K06230+K01357+K00572+K04490+K02353+K06226+K00445+K02375+K02085+K02157+K02353+K01064+K02235+K02842+K02375+K06229+K11101+K11988+K04385+K02354+K04490
Systemic lupus erythematosus	ko05322	27	ENSBTAG00000002259;ENSBTAG00000007153;ENSBTAG00000010520;ENSBTAG00000011193;ENSBTAG00000011215;ENSBTAG00000013900;ENSBTAG00000024177;ENSBTAG00000024183;ENSBTAG00000024188;ENSBTAG00000025471;ENSBTAG00000025882;ENSBTAG00000031757;ENSBTAG00000031760;ENSBTAG00000031769;ENSBTAG00000031778;ENSBTAG00000031886;ENSBTAG00000031889;ENSBTAG00000032455;ENSBTAG00000033327;ENSBTAG00000034609;ENSBTAG00000034949;…	K10785+K03986+K03999+K03988+K05699+K10651+K11252+K11251+K11252+K03156+K11252+K11252+K11252+K11252+K11252+K11252+K11252+K11252+K11252+K10785+K11251+K11252+K11252+K11252+K01327+K11252+K11251
Gap junction	ko04540	26	ENSBTAG00000001014;ENSBTAG00000001242;ENSBTAG00000001835;ENSBTAG00000004093;ENSBTAG00000005464;ENSBTAG00000006208;ENSBTAG00000008938;ENSBTAG00000009520;ENSBTAG00000012510;ENSBTAG00000013550;ENSBTAG00000014367;ENSBTAG00000014541;ENSBTAG00000016156;ENSBTAG00000018705;ENSBTAG00000018777;ENSBTAG00000019079;ENSBTAG00000020455;ENSBTAG00000020921;ENSBTAG00000021013;ENSBTAG00000025274;ENSBTAG00000044144;…	K04464+K04141+K07372+K07375+K08046+K08047+K05704+K08041+K05858+K02677+K04345+K04359+K04371+K08043+K08045+K05858+K04958+K02677+K07375+K07375+K12318+K04604+K07375+K02833+K07375+K04604
Olfactory transduction	ko04740	26	ENSBTAG00000000232;ENSBTAG00000002679;ENSBTAG00000003551;ENSBTAG00000003582;ENSBTAG00000005600;ENSBTAG00000008324;ENSBTAG00000012653;ENSBTAG00000014367;ENSBTAG00000015137;ENSBTAG00000018705;ENSBTAG00000019435;ENSBTAG00000019768;ENSBTAG00000024752;ENSBTAG00000027637;ENSBTAG00000033509;ENSBTAG00000035396;ENSBTAG00000035587;ENSBTAG00000037485;ENSBTAG00000037875;ENSBTAG00000038590;ENSBTAG00000039241;…	K04257+K04257+K04257+K04257+K04257+K04257+K04515+K04345+K04257+K08043+K04257+K04257+K04257+K04257+K04257+K04257+K04439+K04257+K04257+K04257+K04257+K04257+K04257+K04257+K04257+K04257
RNA transport	ko03013	25	ENSBTAG00000002458;ENSBTAG00000002734;ENSBTAG00000003665;ENSBTAG00000004861;ENSBTAG00000004965;ENSBTAG00000005898;ENSBTAG00000006250;ENSBTAG00000007474;ENSBTAG00000008498;ENSBTAG00000009488;ENSBTAG00000009969;ENSBTAG00000010613;ENSBTAG00000012095;ENSBTAG00000012881;ENSBTAG00000013150;ENSBTAG00000016849;ENSBTAG00000017125;ENSBTAG00000017128;ENSBTAG00000020179;ENSBTAG00000020858;ENSBTAG00000020922;…	K14312+K03248+K14314+K03249+K14300+K14292+K14323+K03253+K12881+K14284+K14325+K14311+K13133+K03260+K13174+K13126+K13126+K14296+K14320+K14328+K14326+K13130+K14303+K00784+K14325
Notch signaling pathway	ko04330	25	ENSBTAG00000000746;ENSBTAG00000001470;ENSBTAG00000003075;ENSBTAG00000003397;ENSBTAG00000004046;ENSBTAG00000007909;ENSBTAG00000008480;ENSBTAG00000010696;ENSBTAG00000011283;ENSBTAG00000015043;ENSBTAG00000016198;ENSBTAG00000016738;ENSBTAG00000017097;ENSBTAG00000018002;ENSBTAG00000019336;ENSBTAG00000019461;ENSBTAG00000022799;ENSBTAG00000024603;ENSBTAG00000025424;ENSBTAG00000031476;ENSBTAG00000037962;…	K06062+K06058+K02353+K04496+K06058+K02599+K04496+K02353+K06053+K05948+K04498+K06058+K06056+K06058+K02353+K06057+K02599+K06065+K02599+K06051+K06061+K05948+K02599+K06062+K06061
Fc gamma R-mediated phagocytosis	ko04666	25	ENSBTAG00000000710;ENSBTAG00000002082;ENSBTAG00000002350;ENSBTAG00000002922;ENSBTAG00000005978;ENSBTAG00000009175;ENSBTAG00000009872;ENSBTAG00000011043;ENSBTAG00000012263;ENSBTAG00000013362;ENSBTAG00000013550;ENSBTAG00000014319;ENSBTAG00000016156;ENSBTAG00000017584;ENSBTAG00000017636;ENSBTAG00000019604;ENSBTAG00000020034;ENSBTAG00000020126;ENSBTAG00000020921;ENSBTAG00000021249;ENSBTAG00000031575;…	K00889+K12561+K02649+K08091+K02649+K04688+K04718+K07860+K12488+K01528+K02677+K01528+K04371+K05859+K04456+K06274+K05854+K12559+K02677+K07362+K05730+K12562+K05743+K04438+K05747
Gastric acid secretion	ko04971	25	ENSBTAG00000005236;ENSBTAG00000005464;ENSBTAG00000006208;ENSBTAG00000008766;ENSBTAG00000008777;ENSBTAG00000009520;ENSBTAG00000010347;ENSBTAG00000011226;ENSBTAG00000012510;ENSBTAG00000012653;ENSBTAG00000013550;ENSBTAG00000013680;ENSBTAG00000014367;ENSBTAG00000014818;ENSBTAG00000014930;ENSBTAG00000017312;ENSBTAG00000018635;ENSBTAG00000018705;ENSBTAG00000018777;ENSBTAG00000019079;ENSBTAG00000019961;…	K04195+K08046+K08047+K05742+K01542+K08041+K08007+K13855+K05858+K04515+K02677+K01540+K04345+K00907+K00907+K05237+K01539+K08043+K08045+K05858+K01543+K04958+K02677+K05009+K04926
Spliceosome	ko03040	24	ENSBTAG00000002830;ENSBTAG00000003259;ENSBTAG00000005289;ENSBTAG00000007606;ENSBTAG00000008339;ENSBTAG00000008498;ENSBTAG00000008985;ENSBTAG00000009077;ENSBTAG00000010691;ENSBTAG00000011488;ENSBTAG00000011596;ENSBTAG00000011656;ENSBTAG00000013309;ENSBTAG00000014366;ENSBTAG00000014759;ENSBTAG00000014766;ENSBTAG00000018258;ENSBTAG00000021058;ENSBTAG00000021580;ENSBTAG00000021951;ENSBTAG00000025452;…	K12837+K12824+K12841+K12888+K12818+K12881+K12889+K11091+K12847+K12856+K12893+K12855+K12893+K10599+K12866+K12890+K12891+K12835+K12741+K12840+K12826+K12870+K12838+K12887
Phosphatidylinositol signaling system	ko04070	24	ENSBTAG00000000710;ENSBTAG00000001354;ENSBTAG00000001675;ENSBTAG00000002350;ENSBTAG00000004449;ENSBTAG00000005091;ENSBTAG00000005978;ENSBTAG00000006052;ENSBTAG00000007320;ENSBTAG00000009181;ENSBTAG00000012510;ENSBTAG00000013550;ENSBTAG00000013636;ENSBTAG00000013971;ENSBTAG00000017240;ENSBTAG00000017584;ENSBTAG00000019079;ENSBTAG00000019167;ENSBTAG00000020455;ENSBTAG00000020616;ENSBTAG00000020921;…	K00889+K01099+K00911+K02649+K00901+K00901+K02649+K05857+K00888+K01106+K05858+K02677+K00901+K00888+K00901+K05859+K05858+K01106+K04958+K00901+K02677+K01106+K01092+K00981
Oocyte meiosis	ko04114	24	ENSBTAG00000000623;ENSBTAG00000001937;ENSBTAG00000002705;ENSBTAG00000005269;ENSBTAG00000005464;ENSBTAG00000005533;ENSBTAG00000006208;ENSBTAG00000009520;ENSBTAG00000011631;ENSBTAG00000012146;ENSBTAG00000012184;ENSBTAG00000012653;ENSBTAG00000014367;ENSBTAG00000014453;ENSBTAG00000016005;ENSBTAG00000016156;ENSBTAG00000018705;ENSBTAG00000018777;ENSBTAG00000019145;ENSBTAG00000020192;ENSBTAG00000020455;…	K02602+K03358+K13054+K05868+K08046+K11584+K08047+K08041+K06630+K06269+K06635+K04515+K04345+K06631+K04348+K04371+K08043+K08045+K04367+K11584+K04958+K06630+K03349+K06635
ErbB signaling pathway	ko04012	23	ENSBTAG00000002350;ENSBTAG00000005978;ENSBTAG00000008409;ENSBTAG00000008938;ENSBTAG00000009175;ENSBTAG00000009494;ENSBTAG00000009587;ENSBTAG00000010444;ENSBTAG00000010689;ENSBTAG00000012653;ENSBTAG00000013550;ENSBTAG00000013958;ENSBTAG00000016072;ENSBTAG00000016156;ENSBTAG00000017584;ENSBTAG00000017636;ENSBTAG00000018134;ENSBTAG00000019076;ENSBTAG00000019838;ENSBTAG00000020921;ENSBTAG00000021761;…	K02649+K02649+K04377+K05704+K04688+K04707+K05457+K05084+K05456+K04515+K02677+K05734+K06279+K04371+K05859+K04456+K09782+K05735+K06279+K02677+K04365+K04438+K02833
B cell receptor signaling pathway	ko04662	23	ENSBTAG00000000656;ENSBTAG00000001778;ENSBTAG00000002350;ENSBTAG00000005841;ENSBTAG00000005978;ENSBTAG00000006366;ENSBTAG00000007591;ENSBTAG00000007599;ENSBTAG00000011043;ENSBTAG00000011887;ENSBTAG00000013851;ENSBTAG00000014698;ENSBTAG00000016005;ENSBTAG00000016156;ENSBTAG00000016683;ENSBTAG00000017636;ENSBTAG00000018270;ENSBTAG00000020034;ENSBTAG00000020270;ENSBTAG00000020294;ENSBTAG00000027916;…	K04446+K02581+K02649+K06512+K02649+K04446+K04467+K07209+K07860+K06467+K07368+K07367+K04348+K04371+K04734+K04456+K04446+K05854+K02580+K05697+K07369+K05730+K02833
Long-term potentiation	ko04720	23	ENSBTAG00000005800;ENSBTAG00000006828;ENSBTAG00000009520;ENSBTAG00000010660;ENSBTAG00000012146;ENSBTAG00000012510;ENSBTAG00000012653;ENSBTAG00000013550;ENSBTAG00000014367;ENSBTAG00000014609;ENSBTAG00000016005;ENSBTAG00000016156;ENSBTAG00000016198;ENSBTAG00000019079;ENSBTAG00000020455;ENSBTAG00000020921;ENSBTAG00000021761;ENSBTAG00000023369;ENSBTAG00000035662;ENSBTAG00000040042;ENSBTAG00000044181;…	K05197+K08014+K08041+K04850+K06269+K05858+K04515+K02677+K04345+K06270+K04348+K04371+K04498+K05858+K04958+K02677+K04365+K05212+K05869+K05211+K04604+K02833+K04604
Pancreatic secretion	ko04972	23	ENSBTAG00000000765;ENSBTAG00000001305;ENSBTAG00000002148;ENSBTAG00000005464;ENSBTAG00000006156;ENSBTAG00000006208;ENSBTAG00000007486;ENSBTAG00000008766;ENSBTAG00000009520;ENSBTAG00000009552;ENSBTAG00000011226;ENSBTAG00000012510;ENSBTAG00000013300;ENSBTAG00000013550;ENSBTAG00000013680;ENSBTAG00000014806;ENSBTAG00000018635;ENSBTAG00000018705;ENSBTAG00000018777;ENSBTAG00000019079;ENSBTAG00000020455;…	K14075+K05850+K07884+K08046+K01242+K08047+K12298+K05742+K08041+K05850+K13855+K05858+K04936+K02677+K01540+K05853+K01539+K08043+K08045+K05858+K04958+K02677+K04926
Chronic myeloid leukemia	ko05220	23	ENSBTAG00000002350;ENSBTAG00000002922;ENSBTAG00000003397;ENSBTAG00000003971;ENSBTAG00000005978;ENSBTAG00000006640;ENSBTAG00000007591;ENSBTAG00000007599;ENSBTAG00000008409;ENSBTAG00000008480;ENSBTAG00000009494;ENSBTAG00000014400;ENSBTAG00000016072;ENSBTAG00000016156;ENSBTAG00000016683;ENSBTAG00000017636;ENSBTAG00000019838;ENSBTAG00000020270;ENSBTAG00000020566;ENSBTAG00000021761;ENSBTAG00000034220;…	K02649+K08091+K04496+K06620+K02649+K06618+K04467+K07209+K04377+K04496+K04707+K09389+K06279+K04371+K04734+K04456+K06279+K02580+K08878+K04365+K06621+K04438+K02833
GnRH signaling pathway	ko04912	22	ENSBTAG00000001014;ENSBTAG00000005464;ENSBTAG00000006208;ENSBTAG00000008151;ENSBTAG00000008938;ENSBTAG00000009520;ENSBTAG00000010576;ENSBTAG00000010660;ENSBTAG00000012510;ENSBTAG00000012653;ENSBTAG00000013790;ENSBTAG00000014367;ENSBTAG00000016097;ENSBTAG00000016156;ENSBTAG00000018705;ENSBTAG00000018777;ENSBTAG00000019079;ENSBTAG00000019267;ENSBTAG00000020455;ENSBTAG00000020783;ENSBTAG00000046644;…	K04464+K08046+K08047+K04421+K05704+K08041+K04432+K04850+K05858+K04515+K04416+K04345+K04853+K04371+K08043+K08045+K05858+K01398+K04958+K04441+K02833+K04857
Hypertrophic cardiomyopathy (HCM)	ko05410	22	ENSBTAG00000002036;ENSBTAG00000002297;ENSBTAG00000007547;ENSBTAG00000008380;ENSBTAG00000009080;ENSBTAG00000009489;ENSBTAG00000010660;ENSBTAG00000011580;ENSBTAG00000012897;ENSBTAG00000013745;ENSBTAG00000016097;ENSBTAG00000016566;ENSBTAG00000017266;ENSBTAG00000017574;ENSBTAG00000018169;ENSBTAG00000021657;ENSBTAG00000021707;ENSBTAG00000021808;ENSBTAG00000021994;ENSBTAG00000022000;ENSBTAG00000025471;…	K04862+K04865+K04866+K06587+K06589+K04859+K04850+K06265+K06583+K06484+K04853+K06585+K06485+K12641+K06525+K04871+K12568+K04864+K04861+K04863+K03156+K04857
Pyrimidine metabolism	ko00240	21	ENSBTAG00000000590;ENSBTAG00000001626;ENSBTAG00000002983;ENSBTAG00000003025;ENSBTAG00000005152;ENSBTAG00000005270;ENSBTAG00000006481;ENSBTAG00000006768;ENSBTAG00000011083;ENSBTAG00000011527;ENSBTAG00000011795;ENSBTAG00000011998;ENSBTAG00000012241;ENSBTAG00000013727;ENSBTAG00000015408;ENSBTAG00000016590;ENSBTAG00000017951;ENSBTAG00000018044;ENSBTAG00000019979;ENSBTAG00000030820;ENSBTAG00000043581;	K02324+K01937+K01081+K00940+K00857+K01081+K02999+K12305+K02327+K01081+K00384+K01520+K02328+K13421+K00943+K00940+K03505+K14721+K13809+K01081+K00384
Glycerophospholipid metabolism	ko00564	21	ENSBTAG00000000675;ENSBTAG00000001139;ENSBTAG00000004442;ENSBTAG00000004449;ENSBTAG00000005091;ENSBTAG00000005137;ENSBTAG00000005730;ENSBTAG00000007456;ENSBTAG00000007512;ENSBTAG00000007668;ENSBTAG00000008998;ENSBTAG00000013636;ENSBTAG00000015908;ENSBTAG00000016050;ENSBTAG00000016432;ENSBTAG00000016814;ENSBTAG00000017240;ENSBTAG00000020456;ENSBTAG00000020616;ENSBTAG00000032137;ENSBTAG00000045787;	K00995+K01049+K13509+K00901+K00901+K13514+K13506+K13511+K06129+K13523+K01613+K00901+K13516+K14156+K00551+K00623+K00901+K13523+K00901+K14676+K00981
Bile secretion	ko04976	21	ENSBTAG00000004629;ENSBTAG00000005287;ENSBTAG00000005464;ENSBTAG00000005997;ENSBTAG00000006208;ENSBTAG00000008766;ENSBTAG00000009520;ENSBTAG00000009617;ENSBTAG00000011226;ENSBTAG00000012314;ENSBTAG00000013452;ENSBTAG00000013680;ENSBTAG00000014367;ENSBTAG00000015164;ENSBTAG00000018635;ENSBTAG00000018705;ENSBTAG00000018777;ENSBTAG00000023419;ENSBTAG00000032603;ENSBTAG00000039971;ENSBTAG00000047181;	K12040+K00489+K08046+K05658+K08047+K05742+K08041+K07299+K13855+K12473+K09877+K01540+K04345+K08748+K01539+K08043+K08045+K11822+K05673+K11822+K05673
Hematopoietic cell lineage	ko04640	20	ENSBTAG00000001602;ENSBTAG00000004270;ENSBTAG00000007558;ENSBTAG00000011359;ENSBTAG00000011887;ENSBTAG00000012771;ENSBTAG00000013203;ENSBTAG00000013334;ENSBTAG00000013745;ENSBTAG00000014666;ENSBTAG00000015032;ENSBTAG00000015710;ENSBTAG00000016881;ENSBTAG00000017266;ENSBTAG00000021462;ENSBTAG00000022893;ENSBTAG00000024960;ENSBTAG00000025471;ENSBTAG00000039059;ENSBTAG00000047988;	K05071+K06468+K05073+K06457+K06467+K05090+K06260+K05061+K06484+K06263+K04391+K06451+K11140+K06485+K05423+K06448+K06448+K03156+K06262+K06448
Progesterone-mediated oocyte maturation	ko04914	20	ENSBTAG00000000623;ENSBTAG00000001937;ENSBTAG00000002350;ENSBTAG00000002474;ENSBTAG00000005218;ENSBTAG00000005269;ENSBTAG00000005464;ENSBTAG00000005978;ENSBTAG00000006208;ENSBTAG00000009520;ENSBTAG00000014367;ENSBTAG00000014453;ENSBTAG00000016156;ENSBTAG00000017636;ENSBTAG00000018705;ENSBTAG00000018777;ENSBTAG00000019145;ENSBTAG00000020783;ENSBTAG00000021761;ENSBTAG00000046223;	K02602+K03358+K02649+K06638+K13296+K05868+K08046+K02649+K08047+K08041+K04345+K06631+K04371+K04456+K08043+K08045+K04367+K04441+K04365+K03349
Type II diabetes mellitus	ko04930	20	ENSBTAG00000002350;ENSBTAG00000004386;ENSBTAG00000005978;ENSBTAG00000006535;ENSBTAG00000007599;ENSBTAG00000007882;ENSBTAG00000009835;ENSBTAG00000010660;ENSBTAG00000010690;ENSBTAG00000013108;ENSBTAG00000014828;ENSBTAG00000014898;ENSBTAG00000016156;ENSBTAG00000017056;ENSBTAG00000020887;ENSBTAG00000021308;ENSBTAG00000021988;ENSBTAG00000025471;ENSBTAG00000026344;ENSBTAG00000032288;	K02649+K04694+K02649+K07187+K07209+K04849+K04854+K04850+K07594+K00844+K04344+K00844+K04371+K12406+K04852+K07187+K04697+K03156+K07595+K12407
Adherens junction	ko04520	19	ENSBTAG00000000253;ENSBTAG00000001002;ENSBTAG00000008938;ENSBTAG00000010111;ENSBTAG00000011043;ENSBTAG00000011215;ENSBTAG00000011851;ENSBTAG00000013110;ENSBTAG00000013784;ENSBTAG00000015457;ENSBTAG00000016156;ENSBTAG00000016198;ENSBTAG00000017877;ENSBTAG00000018942;ENSBTAG00000019044;ENSBTAG00000020294;ENSBTAG00000024715;ENSBTAG00000046555;ENSBTAG00000047475;	K05695+K02620+K05704+K04490+K07860+K05699+K05703+K06082+K03097+K04362+K04371+K04498+K06593+K06085+K05627+K05697+K05698+K05747+K04490
Oxidative phosphorylation	ko00190	18	ENSBTAG00000001423;ENSBTAG00000003279;ENSBTAG00000007812;ENSBTAG00000008777;ENSBTAG00000009534;ENSBTAG00000010957;ENSBTAG00000012117;ENSBTAG00000012634;ENSBTAG00000014486;ENSBTAG00000015294;ENSBTAG00000018188;ENSBTAG00000019096;ENSBTAG00000019419;ENSBTAG00000019961;ENSBTAG00000020405;ENSBTAG00000021776;ENSBTAG00000043577;ENSBTAG00000046019;	K03964+K03954+K11353+K01542+K03966+K11725+K03662+K03963+K01544+K02257+K03968+K00414+K03940+K01543+K03965+K03942+K03881+K00234
Peroxisome	ko04146	18	ENSBTAG00000001932;ENSBTAG00000003126;ENSBTAG00000004248;ENSBTAG00000005532;ENSBTAG00000005797;ENSBTAG00000006140;ENSBTAG00000006894;ENSBTAG00000007946;ENSBTAG00000009309;ENSBTAG00000016791;ENSBTAG00000017819;ENSBTAG00000018321;ENSBTAG00000018831;ENSBTAG00000018894;ENSBTAG00000019625;ENSBTAG00000020371;ENSBTAG00000023614;ENSBTAG00000033367;	K00624+K13335+K01578+K13339+K00830+K13351+K13241+K00306+K13346+K13341+K13273+K00308+K00273+K13353+K07514+K11992+K13355+K00272
Hedgehog signaling pathway	ko04340	18	ENSBTAG00000001341;ENSBTAG00000002940;ENSBTAG00000005111;ENSBTAG00000006631;ENSBTAG00000009217;ENSBTAG00000009532;ENSBTAG00000013287;ENSBTAG00000013990;ENSBTAG00000014367;ENSBTAG00000017892;ENSBTAG00000019234;ENSBTAG00000020267;ENSBTAG00000021068;ENSBTAG00000024137;ENSBTAG00000024552;ENSBTAG00000025246;ENSBTAG00000046803;ENSBTAG00000046807;	K00444+K01558+K04662+K06230+K01357+K00572+K06226+K00445+K04345+K04663+K04663+K01064+K06229+K11101+K11988+K06235+K06232+K04663
Cytosolic DNA-sensing pathway	ko04623	18	ENSBTAG00000001778;ENSBTAG00000007591;ENSBTAG00000007599;ENSBTAG00000008406;ENSBTAG00000010408;ENSBTAG00000013545;ENSBTAG00000016683;ENSBTAG00000018044;ENSBTAG00000020270;ENSBTAG00000020535;ENSBTAG00000025257;ENSBTAG00000025928;ENSBTAG00000033695;ENSBTAG00000039963;ENSBTAG00000046427;ENSBTAG00000046456;ENSBTAG00000047680;ENSBTAG00000047782;	K02581+K04467+K07209+K10790+K07211+K12648+K04734+K14721+K02580+K12799+K12964+K05414+K05415+K05414+K05414+K05415+K09447+K05414
Adipocytokine signaling pathway	ko04920	18	ENSBTAG00000000602;ENSBTAG00000001778;ENSBTAG00000006535;ENSBTAG00000007591;ENSBTAG00000007599;ENSBTAG00000007897;ENSBTAG00000009617;ENSBTAG00000009727;ENSBTAG00000010497;ENSBTAG00000010815;ENSBTAG00000011934;ENSBTAG00000012642;ENSBTAG00000016683;ENSBTAG00000016801;ENSBTAG00000017636;ENSBTAG00000020270;ENSBTAG00000021308;ENSBTAG00000025471;	K08525+K02581+K07187+K04467+K07209+K05228+K07299+K07297+K03173+K07359+K01596+K03171+K04734+K08526+K04456+K02580+K07187+K03156
Parkinson's disease	ko05012	18	ENSBTAG00000001423;ENSBTAG00000003279;ENSBTAG00000005078;ENSBTAG00000006084;ENSBTAG00000007812;ENSBTAG00000009534;ENSBTAG00000012335;ENSBTAG00000012634;ENSBTAG00000015843;ENSBTAG00000018188;ENSBTAG00000018996;ENSBTAG00000019096;ENSBTAG00000019419;ENSBTAG00000020124;ENSBTAG00000020405;ENSBTAG00000021776;ENSBTAG00000043577;ENSBTAG00000046019;	K03964+K03954+K05611+K05688+K11353+K03966+K10698+K03963+K05036+K03968+K04556+K00414+K03940+K08669+K03965+K03942+K03881+K00234
Non-small cell lung cancer	ko05223	18	ENSBTAG00000000602;ENSBTAG00000002350;ENSBTAG00000003971;ENSBTAG00000005978;ENSBTAG00000006640;ENSBTAG00000010427;ENSBTAG00000011234;ENSBTAG00000011518;ENSBTAG00000013550;ENSBTAG00000014400;ENSBTAG00000016156;ENSBTAG00000016801;ENSBTAG00000017584;ENSBTAG00000017636;ENSBTAG00000020921;ENSBTAG00000021761;ENSBTAG00000034220;ENSBTAG00000046644;	K08525+K02649+K06620+K02649+K06618+K08015+K09408+K08528+K02677+K09389+K04371+K08526+K05859+K04456+K02677+K04365+K06621+K02833
VEGF signaling pathway	ko04370	17	ENSBTAG00000000656;ENSBTAG00000002350;ENSBTAG00000005978;ENSBTAG00000006366;ENSBTAG00000008938;ENSBTAG00000009872;ENSBTAG00000011043;ENSBTAG00000013550;ENSBTAG00000016005;ENSBTAG00000016072;ENSBTAG00000016156;ENSBTAG00000017584;ENSBTAG00000017636;ENSBTAG00000018270;ENSBTAG00000020783;ENSBTAG00000020921;ENSBTAG00000046644;	K04446+K02649+K02649+K04446+K05704+K04718+K07860+K02677+K04348+K06279+K04371+K05859+K04456+K04446+K04441+K02677+K02833
Fc epsilon RI signaling pathway	ko04664	17	ENSBTAG00000002350;ENSBTAG00000002922;ENSBTAG00000005978;ENSBTAG00000010576;ENSBTAG00000011043;ENSBTAG00000011851;ENSBTAG00000016156;ENSBTAG00000016836;ENSBTAG00000017584;ENSBTAG00000017636;ENSBTAG00000020034;ENSBTAG00000020783;ENSBTAG00000021249;ENSBTAG00000024503;ENSBTAG00000025471;ENSBTAG00000031575;ENSBTAG00000046644;	K02649+K08091+K02649+K04432+K07860+K05703+K04371+K12077+K05859+K04456+K05854+K04441+K07362+K07983+K03156+K05730+K02833
Pancreatic cancer	ko05212	17	ENSBTAG00000002350;ENSBTAG00000003147;ENSBTAG00000003971;ENSBTAG00000005339;ENSBTAG00000005978;ENSBTAG00000006640;ENSBTAG00000007591;ENSBTAG00000007599;ENSBTAG00000011043;ENSBTAG00000014400;ENSBTAG00000016156;ENSBTAG00000017636;ENSBTAG00000020270;ENSBTAG00000021250;ENSBTAG00000021761;ENSBTAG00000034220;ENSBTAG00000047561;	K02649+K11217+K06620+K05448+K02649+K06618+K04467+K07209+K07860+K09389+K04371+K04456+K02580+K08773+K04365+K06621+K05448
Glioma	ko05214	17	ENSBTAG00000002350;ENSBTAG00000003971;ENSBTAG00000005978;ENSBTAG00000006640;ENSBTAG00000012653;ENSBTAG00000013550;ENSBTAG00000014400;ENSBTAG00000014541;ENSBTAG00000016072;ENSBTAG00000016156;ENSBTAG00000017584;ENSBTAG00000017636;ENSBTAG00000019838;ENSBTAG00000020921;ENSBTAG00000021761;ENSBTAG00000034220;ENSBTAG00000046644;	K02649+K06620+K02649+K06618+K04515+K02677+K09389+K04359+K06279+K04371+K05859+K04456+K06279+K02677+K04365+K06621+K02833
Acute myeloid leukemia	ko05221	17	ENSBTAG00000001002;ENSBTAG00000002350;ENSBTAG00000005978;ENSBTAG00000007591;ENSBTAG00000007599;ENSBTAG00000008409;ENSBTAG00000009175;ENSBTAG00000010111;ENSBTAG00000012500;ENSBTAG00000016156;ENSBTAG00000017542;ENSBTAG00000017636;ENSBTAG00000017685;ENSBTAG00000020270;ENSBTAG00000021761;ENSBTAG00000046644;ENSBTAG00000047475;	K02620+K02649+K02649+K04467+K07209+K04377+K04688+K04490+K08527+K04371+K04504+K04456+K10056+K02580+K04365+K02833+K04490
Viral myocarditis	ko05416	17	ENSBTAG00000001008;ENSBTAG00000002069;ENSBTAG00000002259;ENSBTAG00000002580;ENSBTAG00000003512;ENSBTAG00000007103;ENSBTAG00000009703;ENSBTAG00000010303;ENSBTAG00000011043;ENSBTAG00000011580;ENSBTAG00000011803;ENSBTAG00000011851;ENSBTAG00000012881;ENSBTAG00000017060;ENSBTAG00000020116;ENSBTAG00000025337;ENSBTAG00000034609;	K07818+K06751+K10785+K10352+K10352+K05718+K10352+K06490+K07860+K06265+K10352+K05703+K03260+K06464+K06751+K10352+K10785
Glycine, serine and threonine metabolism	ko00260	16	ENSBTAG00000001041;ENSBTAG00000002110;ENSBTAG00000004112;ENSBTAG00000004510;ENSBTAG00000005797;ENSBTAG00000007946;ENSBTAG00000008434;ENSBTAG00000009029;ENSBTAG00000013960;ENSBTAG00000017094;ENSBTAG00000018831;ENSBTAG00000025903;ENSBTAG00000030334;ENSBTAG00000031500;ENSBTAG00000039719;ENSBTAG00000046264;	K00276+K00315+K00542+K00314+K00830+K00306+K00639+K01620+K00831+K00600+K00273+K00281+K00276+K00600+K00058+K00276
Inositol phosphate metabolism	ko00562	16	ENSBTAG00000000710;ENSBTAG00000001354;ENSBTAG00000001675;ENSBTAG00000003387;ENSBTAG00000005928;ENSBTAG00000006052;ENSBTAG00000007320;ENSBTAG00000009181;ENSBTAG00000012510;ENSBTAG00000013971;ENSBTAG00000017584;ENSBTAG00000018469;ENSBTAG00000019079;ENSBTAG00000019167;ENSBTAG00000024107;ENSBTAG00000043951;	K00889+K01099+K00911+K13712+K03103+K05857+K00888+K01106+K05858+K00888+K05859+K00140+K05858+K01106+K01106+K01092
mRNA surveillance pathway	ko03015	16	ENSBTAG00000002090;ENSBTAG00000005533;ENSBTAG00000006250;ENSBTAG00000008355;ENSBTAG00000008498;ENSBTAG00000009488;ENSBTAG00000009969;ENSBTAG00000016849;ENSBTAG00000017125;ENSBTAG00000018406;ENSBTAG00000019714;ENSBTAG00000020192;ENSBTAG00000020858;ENSBTAG00000020922;ENSBTAG00000021747;ENSBTAG00000046336;	K14404+K11584+K14323+K14401+K12881+K14284+K14325+K13126+K13126+K14407+K14411+K11584+K14328+K14326+K11125+K14325
PPAR signaling pathway	ko03320	16	ENSBTAG00000000559;ENSBTAG00000000602;ENSBTAG00000002473;ENSBTAG00000005287;ENSBTAG00000010681;ENSBTAG00000011934;ENSBTAG00000014649;ENSBTAG00000015164;ENSBTAG00000015350;ENSBTAG00000015436;ENSBTAG00000015505;ENSBTAG00000016775;ENSBTAG00000016801;ENSBTAG00000017542;ENSBTAG00000019625;ENSBTAG00000022449;	K08761+K08525+K08767+K00489+K08536+K01596+K08766+K08748+K08768+K08745+K10226+K08745+K08526+K04504+K07514+K00507
Complement and coagulation cascades	ko04610	16	ENSBTAG00000000070;ENSBTAG00000001244;ENSBTAG00000002758;ENSBTAG00000007052;ENSBTAG00000007153;ENSBTAG00000007411;ENSBTAG00000010520;ENSBTAG00000011193;ENSBTAG00000012265;ENSBTAG00000012467;ENSBTAG00000013973;ENSBTAG00000017722;ENSBTAG00000018872;ENSBTAG00000019741;ENSBTAG00000021717;ENSBTAG00000046158;	K03906+K01343+K03907+K03915+K03986+K01320+K03999+K03988+K03900+K03992+K03912+K03902+K01328+K04009+K03916+K01335
Long-term depression	ko04730	16	ENSBTAG00000002023;ENSBTAG00000005800;ENSBTAG00000006999;ENSBTAG00000012510;ENSBTAG00000013550;ENSBTAG00000014828;ENSBTAG00000016156;ENSBTAG00000019079;ENSBTAG00000020034;ENSBTAG00000020455;ENSBTAG00000020921;ENSBTAG00000021761;ENSBTAG00000044144;ENSBTAG00000044181;ENSBTAG00000046644;ENSBTAG00000048061;	K13240+K05197+K04961+K05858+K02677+K04344+K04371+K05858+K05854+K04958+K02677+K04365+K12318+K04604+K02833+K04604
Leishmaniasis	ko05140	16	ENSBTAG00000000563;ENSBTAG00000001778;ENSBTAG00000003147;ENSBTAG00000003895;ENSBTAG00000006894;ENSBTAG00000008004;ENSBTAG00000016085;ENSBTAG00000016156;ENSBTAG00000016683;ENSBTAG00000017060;ENSBTAG00000019828;ENSBTAG00000020270;ENSBTAG00000020294;ENSBTAG00000020783;ENSBTAG00000020921;ENSBTAG00000025471;	K04729+K02581+K11217+K08009+K13241+K08010+K04730+K04371+K04734+K06464+K04403+K02580+K05697+K04441+K02677+K03156
Renal cell carcinoma	ko05211	16	ENSBTAG00000002350;ENSBTAG00000005339;ENSBTAG00000005978;ENSBTAG00000008010;ENSBTAG00000009617;ENSBTAG00000013958;ENSBTAG00000016156;ENSBTAG00000016198;ENSBTAG00000017636;ENSBTAG00000017996;ENSBTAG00000019076;ENSBTAG00000021037;ENSBTAG00000021761;ENSBTAG00000045548;ENSBTAG00000046644;ENSBTAG00000047561;	K02649+K05448+K02649+K09594+K07299+K05734+K04371+K04498+K04456+K09592+K05735+K09097+K04365+K04438+K02833+K05448
Glycolysis / Gluconeogenesis	ko00010	15	ENSBTAG00000000286;ENSBTAG00000002683;ENSBTAG00000008743;ENSBTAG00000009125;ENSBTAG00000011934;ENSBTAG00000013093;ENSBTAG00000013108;ENSBTAG00000013303;ENSBTAG00000014547;ENSBTAG00000014898;ENSBTAG00000017056;ENSBTAG00000018554;ENSBTAG00000021113;ENSBTAG00000032288;ENSBTAG00000038327;	K00850+K00850+K00128+K00129+K01596+K00129+K00844+K01895+K01834+K00844+K12406+K00134+K00129+K12407+K00627
Arginine and proline metabolism	ko00330	15	ENSBTAG00000001003;ENSBTAG00000001116;ENSBTAG00000002023;ENSBTAG00000004112;ENSBTAG00000005989;ENSBTAG00000006579;ENSBTAG00000006894;ENSBTAG00000008743;ENSBTAG00000011960;ENSBTAG00000015314;ENSBTAG00000016249;ENSBTAG00000017680;ENSBTAG00000018831;ENSBTAG00000035998;ENSBTAG00000047676;	K00933+K00472+K13240+K00542+K11142+K00472+K13241+K00128+K14454+K01755+K11067+K13242+K00273+K00933+K00318
N-Glycan biosynthesis	ko00510	15	ENSBTAG00000000703;ENSBTAG00000001546;ENSBTAG00000001844;ENSBTAG00000003069;ENSBTAG00000005191;ENSBTAG00000010601;ENSBTAG00000011850;ENSBTAG00000012503;ENSBTAG00000015249;ENSBTAG00000016956;ENSBTAG00000018192;ENSBTAG00000020279;ENSBTAG00000021897;ENSBTAG00000024381;ENSBTAG00000033891;	K00779+K00726+K01228+K01230+K12666+K00902+K00729+K00737+K07966+K05546+K03849+K03846+K07968+K01230+K00736
Cardiac muscle contraction	ko04260	15	ENSBTAG00000002036;ENSBTAG00000002297;ENSBTAG00000007547;ENSBTAG00000008766;ENSBTAG00000009489;ENSBTAG00000010660;ENSBTAG00000013680;ENSBTAG00000016097;ENSBTAG00000018635;ENSBTAG00000019096;ENSBTAG00000021657;ENSBTAG00000021808;ENSBTAG00000021994;ENSBTAG00000022000;ENSBTAG00000047491;	K04862+K04865+K04866+K05742+K04859+K04850+K01540+K04853+K01539+K00414+K04871+K04864+K04861+K04863+K04857
Amyotrophic lateral sclerosis (ALS)	ko05014	15	ENSBTAG00000001781;ENSBTAG00000002023;ENSBTAG00000005800;ENSBTAG00000007395;ENSBTAG00000009213;ENSBTAG00000010576;ENSBTAG00000013147;ENSBTAG00000016005;ENSBTAG00000016830;ENSBTAG00000017864;ENSBTAG00000019302;ENSBTAG00000020783;ENSBTAG00000023369;ENSBTAG00000025471;ENSBTAG00000040042;	K11518+K13240+K05197+K04575+K11518+K04432+K04574+K04348+K02308+K07607+K02161+K04441+K05212+K03156+K05211
Bacterial invasion of epithelial cells	ko05100	15	ENSBTAG00000001009;ENSBTAG00000002350;ENSBTAG00000002531;ENSBTAG00000005978;ENSBTAG00000008300;ENSBTAG00000008938;ENSBTAG00000009494;ENSBTAG00000012002;ENSBTAG00000013362;ENSBTAG00000013745;ENSBTAG00000014319;ENSBTAG00000016072;ENSBTAG00000019838;ENSBTAG00000045548;ENSBTAG00000046555;	K06106+K02649+K13736+K02649+K05717+K05704+K04707+K05726+K01528+K06484+K01528+K06279+K06279+K04438+K05747
Amino sugar and nucleotide sugar metabolism	ko00520	14	ENSBTAG00000001022;ENSBTAG00000001142;ENSBTAG00000002995;ENSBTAG00000005845;ENSBTAG00000010136;ENSBTAG00000012985;ENSBTAG00000013108;ENSBTAG00000014668;ENSBTAG00000014898;ENSBTAG00000015512;ENSBTAG00000018223;ENSBTAG00000023535;ENSBTAG00000032288;ENSBTAG00000048054;	K01443+K12409+K00966+K01809+K00983+K05305+K00844+K00884+K00844+K12373+K01183+K01183+K12407+K00972
NOD-like receptor signaling pathway	ko04621	14	ENSBTAG00000001778;ENSBTAG00000007591;ENSBTAG00000007599;ENSBTAG00000014374;ENSBTAG00000015271;ENSBTAG00000016156;ENSBTAG00000016683;ENSBTAG00000019123;ENSBTAG00000019828;ENSBTAG00000020270;ENSBTAG00000020535;ENSBTAG00000020783;ENSBTAG00000024772;ENSBTAG00000025471;	K02581+K04467+K07209+K12797+K08846+K04371+K04734+K12803+K04403+K02580+K12799+K04441+K12792+K03156
Colorectal cancer	ko05210	14	ENSBTAG00000001002;ENSBTAG00000002350;ENSBTAG00000005978;ENSBTAG00000008409;ENSBTAG00000010111;ENSBTAG00000011043;ENSBTAG00000015433;ENSBTAG00000016156;ENSBTAG00000016577;ENSBTAG00000017636;ENSBTAG00000019302;ENSBTAG00000021761;ENSBTAG00000030162;ENSBTAG00000047475;	K02620+K02649+K02649+K04377+K04490+K07860+K02085+K04371+K02157+K04456+K02161+K04365+K04385+K04490
Endometrial cancer	ko05213	14	ENSBTAG00000001002;ENSBTAG00000002350;ENSBTAG00000005978;ENSBTAG00000008409;ENSBTAG00000010111;ENSBTAG00000011234;ENSBTAG00000015433;ENSBTAG00000016156;ENSBTAG00000016577;ENSBTAG00000017636;ENSBTAG00000021761;ENSBTAG00000030162;ENSBTAG00000046644;ENSBTAG00000047475;	K02620+K02649+K02649+K04377+K04490+K09408+K02085+K04371+K02157+K04456+K04365+K04385+K02833+K04490
Rheumatoid arthritis	ko05323	14	ENSBTAG00000000130;ENSBTAG00000002259;ENSBTAG00000005339;ENSBTAG00000007103;ENSBTAG00000007569;ENSBTAG00000008924;ENSBTAG00000010303;ENSBTAG00000012117;ENSBTAG00000017060;ENSBTAG00000025250;ENSBTAG00000025471;ENSBTAG00000034609;ENSBTAG00000045907;ENSBTAG00000047561;	K05475+K10785+K05448+K05718+K05147+K05473+K06490+K03662+K06464+K05408+K03156+K10785+K05476+K05448
Lysine degradation	ko00310	13	ENSBTAG00000000139;ENSBTAG00000002049;ENSBTAG00000002345;ENSBTAG00000004706;ENSBTAG00000005676;ENSBTAG00000006029;ENSBTAG00000006463;ENSBTAG00000007946;ENSBTAG00000008743;ENSBTAG00000012678;ENSBTAG00000014087;ENSBTAG00000019625;ENSBTAG00000021728;	K11428+K00022+K11422+K11419+K11420+K00164+K00658+K00306+K00128+K11703+K11429+K07514+K00164
Glycerolipid metabolism	ko00561	13	ENSBTAG00000000765;ENSBTAG00000004442;ENSBTAG00000004449;ENSBTAG00000005091;ENSBTAG00000005730;ENSBTAG00000007486;ENSBTAG00000007668;ENSBTAG00000008743;ENSBTAG00000013636;ENSBTAG00000017240;ENSBTAG00000018201;ENSBTAG00000020456;ENSBTAG00000020616;	K14075+K13509+K00901+K00901+K13506+K12298+K13523+K00128+K00901+K00901+K00863+K13523+K00901
ABC transporters	ko02010	13	ENSBTAG00000003037;ENSBTAG00000003038;ENSBTAG00000005842;ENSBTAG00000005997;ENSBTAG00000008464;ENSBTAG00000008953;ENSBTAG00000010858;ENSBTAG00000017666;ENSBTAG00000020766;ENSBTAG00000021090;ENSBTAG00000032603;ENSBTAG00000047181;ENSBTAG00000047254;	K05654+K05654+K05674+K05658+K05656+K05653+K05671+K05668+K05645+K05665+K05673+K05673+K05642
Antigen processing and presentation	ko04612	13	ENSBTAG00000002069;ENSBTAG00000002259;ENSBTAG00000003037;ENSBTAG00000003038;ENSBTAG00000005351;ENSBTAG00000008953;ENSBTAG00000016828;ENSBTAG00000018349;ENSBTAG00000020116;ENSBTAG00000020649;ENSBTAG00000025471;ENSBTAG00000034609;ENSBTAG00000045675;	K06751+K10785+K05654+K05654+K08063+K05653+K08058+K08059+K06751+K08060+K03156+K10785+K07980
Maturity onset diabetes of the young	ko04950	13	ENSBTAG00000002518;ENSBTAG00000009265;ENSBTAG00000010277;ENSBTAG00000010690;ENSBTAG00000012104;ENSBTAG00000012407;ENSBTAG00000014217;ENSBTAG00000017056;ENSBTAG00000021795;ENSBTAG00000026344;ENSBTAG00000030876;ENSBTAG00000032288;ENSBTAG00000046010;	K08030+K08027+K08029+K07594+K08038+K08035+K08024+K12406+K08036+K07595+K08025+K12407+K08040
Aldosterone-regulated sodium reabsorption	ko04960	13	ENSBTAG00000002350;ENSBTAG00000005412;ENSBTAG00000005978;ENSBTAG00000006535;ENSBTAG00000009223;ENSBTAG00000013479;ENSBTAG00000013550;ENSBTAG00000013680;ENSBTAG00000016156;ENSBTAG00000018635;ENSBTAG00000020921;ENSBTAG00000021308;ENSBTAG00000027182;	K02649+K13305+K02649+K07187+K06644+K13358+K02677+K01540+K04371+K01539+K02677+K07187+K08555
Melanoma	ko05218	13	ENSBTAG00000002350;ENSBTAG00000003971;ENSBTAG00000005978;ENSBTAG00000006640;ENSBTAG00000008623;ENSBTAG00000014400;ENSBTAG00000014541;ENSBTAG00000015457;ENSBTAG00000016156;ENSBTAG00000017636;ENSBTAG00000021761;ENSBTAG00000034220;ENSBTAG00000046644;	K02649+K06620+K02649+K06618+K04358+K09389+K04359+K04362+K04371+K04456+K04365+K06621+K02833
Bladder cancer	ko05219	13	ENSBTAG00000000738;ENSBTAG00000003971;ENSBTAG00000005339;ENSBTAG00000006640;ENSBTAG00000008409;ENSBTAG00000014400;ENSBTAG00000016156;ENSBTAG00000019267;ENSBTAG00000020676;ENSBTAG00000021761;ENSBTAG00000034220;ENSBTAG00000046644;ENSBTAG00000047561;	K08803+K06620+K05448+K06618+K04377+K09389+K04371+K01398+K01403+K04365+K06621+K02833+K05448
Tryptophan metabolism	ko00380	12	ENSBTAG00000000085;ENSBTAG00000002049;ENSBTAG00000004679;ENSBTAG00000005766;ENSBTAG00000006029;ENSBTAG00000008743;ENSBTAG00000009725;ENSBTAG00000014682;ENSBTAG00000019625;ENSBTAG00000021728;ENSBTAG00000026812;ENSBTAG00000039119;	K07409+K00022+K01867+K03334+K00164+K00128+K00157+K00669+K07514+K00164+K00157+K00669
Aminoacyl-tRNA biosynthesis	ko00970	12	ENSBTAG00000001780;ENSBTAG00000002056;ENSBTAG00000003799;ENSBTAG00000004679;ENSBTAG00000007651;ENSBTAG00000010698;ENSBTAG00000010777;ENSBTAG00000011471;ENSBTAG00000013722;ENSBTAG00000018072;ENSBTAG00000018405;ENSBTAG00000021630;	K01875+K01874+K01868+K01867+K01868+K01873+K01883+K01883+K01872+K01889+K01874+K00604
RNA degradation	ko03018	12	ENSBTAG00000002590;ENSBTAG00000003381;ENSBTAG00000004376;ENSBTAG00000005587;ENSBTAG00000005913;ENSBTAG00000010863;ENSBTAG00000014607;ENSBTAG00000014900;ENSBTAG00000015109;ENSBTAG00000016849;ENSBTAG00000017125;ENSBTAG00000030285;	K12591+K03514+K12571+K12599+K12617+K12610+K11600+K12580+K14443+K13126+K13126+K12611
Nucleotide excision repair	ko03420	12	ENSBTAG00000000590;ENSBTAG00000002072;ENSBTAG00000007362;ENSBTAG00000009711;ENSBTAG00000011083;ENSBTAG00000012241;ENSBTAG00000017951;ENSBTAG00000018589;ENSBTAG00000021569;ENSBTAG00000021606;ENSBTAG00000021773;ENSBTAG00000032527;	K02324+K10844+K10838+K07466+K02327+K02328+K03505+K10755+K10610+K10570+K10848+K10841
mTOR signaling pathway	ko04150	12	ENSBTAG00000002350;ENSBTAG00000002883;ENSBTAG00000005339;ENSBTAG00000005978;ENSBTAG00000009175;ENSBTAG00000012987;ENSBTAG00000016156;ENSBTAG00000017636;ENSBTAG00000020617;ENSBTAG00000021761;ENSBTAG00000030977;ENSBTAG00000047561;	K02649+K07204+K05448+K02649+K04688+K08269+K04371+K04456+K07207+K04365+K08269+K05448
Malaria	ko05144	12	ENSBTAG00000000563;ENSBTAG00000002006;ENSBTAG00000002259;ENSBTAG00000004630;ENSBTAG00000007103;ENSBTAG00000010303;ENSBTAG00000011154;ENSBTAG00000017060;ENSBTAG00000018198;ENSBTAG00000021462;ENSBTAG00000025471;ENSBTAG00000034609;	K04729+K04659+K10785+K04659+K05718+K06490+K06257+K06464+K10161+K05423+K03156+K10785
Tyrosine metabolism	ko00350	11	ENSBTAG00000001041;ENSBTAG00000002300;ENSBTAG00000005766;ENSBTAG00000009125;ENSBTAG00000009725;ENSBTAG00000011960;ENSBTAG00000013093;ENSBTAG00000021113;ENSBTAG00000026812;ENSBTAG00000030334;ENSBTAG00000046264;	K00276+K01827+K03334+K00129+K00157+K14454+K00129+K00129+K00157+K00276+K00276
Staphylococcus aureus infection	ko05150	11	ENSBTAG00000002259;ENSBTAG00000007103;ENSBTAG00000007153;ENSBTAG00000010303;ENSBTAG00000011193;ENSBTAG00000012467;ENSBTAG00000017060;ENSBTAG00000019741;ENSBTAG00000020824;ENSBTAG00000034609;ENSBTAG00000046158;	K10785+K05718+K03986+K06490+K03988+K03992+K06464+K04009+K07604+K10785+K01335
Thyroid cancer	ko05216	11	ENSBTAG00000000602;ENSBTAG00000001002;ENSBTAG00000003060;ENSBTAG00000008409;ENSBTAG00000010111;ENSBTAG00000016156;ENSBTAG00000016801;ENSBTAG00000019354;ENSBTAG00000021761;ENSBTAG00000046644;ENSBTAG00000047475;	K08525+K02620+K03176+K04377+K04490+K04371+K08526+K09293+K04365+K02833+K04490
Primary immunodeficiency	ko05340	11	ENSBTAG00000003037;ENSBTAG00000003038;ENSBTAG00000005280;ENSBTAG00000005351;ENSBTAG00000005892;ENSBTAG00000007626;ENSBTAG00000008953;ENSBTAG00000015710;ENSBTAG00000020649;ENSBTAG00000023393;ENSBTAG00000026489;	K05654+K05654+K01488+K08063+K07360+K05070+K05653+K06451+K08060+K10603+K05151
Valine, leucine and isoleucine degradation	ko00280	10	ENSBTAG00000002049;ENSBTAG00000005766;ENSBTAG00000008743;ENSBTAG00000009725;ENSBTAG00000012096;ENSBTAG00000016037;ENSBTAG00000018469;ENSBTAG00000019625;ENSBTAG00000026812;ENSBTAG00000044160;	K00022+K03334+K00128+K00157+K00167+K00166+K00140+K07514+K00157+K01969
Other types of O-glycan biosynthesis	ko00514	10	ENSBTAG00000000703;ENSBTAG00000002704;ENSBTAG00000012678;ENSBTAG00000013322;ENSBTAG00000015043;ENSBTAG00000015249;ENSBTAG00000021897;ENSBTAG00000038062;ENSBTAG00000040361;ENSBTAG00000046516;	K00779+K00728+K11703+K09666+K05948+K07966+K07968+K07632+K05948+K07635
Glycosaminoglycan biosynthesis - chondroitin sulfate	ko00532	10	ENSBTAG00000004421;ENSBTAG00000004613;ENSBTAG00000005523;ENSBTAG00000007357;ENSBTAG00000007654;ENSBTAG00000009298;ENSBTAG00000014371;ENSBTAG00000020539;ENSBTAG00000020817;ENSBTAG00000037523;	K08105+K00746+K00771+K13499+K04743+K00771+K03419+K00747+K10157+K00734
Sphingolipid metabolism	ko00600	10	ENSBTAG00000001965;ENSBTAG00000002130;ENSBTAG00000005674;ENSBTAG00000008145;ENSBTAG00000009872;ENSBTAG00000014232;ENSBTAG00000014833;ENSBTAG00000015628;ENSBTAG00000020480;ENSBTAG00000046654;	K12354+K12353+K01186+K12351+K04718+K01019+K12357+K12350+K00654+K04715
Ribosome biogenesis in eukaryotes	ko03008	10	ENSBTAG00000002579;ENSBTAG00000004657;ENSBTAG00000005843;ENSBTAG00000009488;ENSBTAG00000012199;ENSBTAG00000013784;ENSBTAG00000015224;ENSBTAG00000017001;ENSBTAG00000017551;ENSBTAG00000020232;	K14563+K14563+K13288+K14284+K14560+K03097+K14562+K14573+K03685+K14570
Base excision repair	ko03410	10	ENSBTAG00000000590;ENSBTAG00000000671;ENSBTAG00000003576;ENSBTAG00000004769;ENSBTAG00000006272;ENSBTAG00000009374;ENSBTAG00000011083;ENSBTAG00000012241;ENSBTAG00000016268;ENSBTAG00000017951;	K02324+K10798+K03512+K10568+K10773+K10798+K02327+K02328+K10803+K03505
p53 signaling pathway	ko04115	10	ENSBTAG00000003994;ENSBTAG00000005269;ENSBTAG00000007102;ENSBTAG00000009223;ENSBTAG00000010106;ENSBTAG00000016649;ENSBTAG00000019634;ENSBTAG00000020617;ENSBTAG00000031385;ENSBTAG00000034220;	K10138+K05868+K10129+K06644+K10152+K10151+K10130+K07207+K10143+K06621
Dorso-ventral axis formation	ko04320	10	ENSBTAG00000000623;ENSBTAG00000007909;ENSBTAG00000014910;ENSBTAG00000015835;ENSBTAG00000016156;ENSBTAG00000022799;ENSBTAG00000025021;ENSBTAG00000025424;ENSBTAG00000040356;ENSBTAG00000043971;	K02602+K02599+K02156+K02156+K04371+K02599+K02184+K02599+K02098+K02599
Vasopressin-regulated water reabsorption	ko04962	10	ENSBTAG00000005464;ENSBTAG00000006143;ENSBTAG00000008027;ENSBTAG00000008493;ENSBTAG00000010215;ENSBTAG00000014367;ENSBTAG00000014700;ENSBTAG00000015802;ENSBTAG00000018705;ENSBTAG00000047138;	K08046+K09048+K05242+K09876+K09048+K04345+K10416+K09048+K08043+K04228
Autoimmune thyroid disease	ko05320	10	ENSBTAG00000001008;ENSBTAG00000002069;ENSBTAG00000002259;ENSBTAG00000007823;ENSBTAG00000020116;ENSBTAG00000025928;ENSBTAG00000034609;ENSBTAG00000039963;ENSBTAG00000046427;ENSBTAG00000047782;	K07818+K06751+K10785+K10809+K06751+K05414+K10785+K05414+K05414+K05414
Fructose and mannose metabolism	ko00051	9	ENSBTAG00000000172;ENSBTAG00000000286;ENSBTAG00000002683;ENSBTAG00000002995;ENSBTAG00000005845;ENSBTAG00000012985;ENSBTAG00000013108;ENSBTAG00000014898;ENSBTAG00000016557;	K01103+K00850+K00850+K00966+K01809+K05305+K00844+K00844+K01112
Alanine, aspartate and glutamate metabolism	ko00250	9	ENSBTAG00000000077;ENSBTAG00000002980;ENSBTAG00000005766;ENSBTAG00000005797;ENSBTAG00000007835;ENSBTAG00000011960;ENSBTAG00000015314;ENSBTAG00000017616;ENSBTAG00000033367;	K01756+K00814+K03334+K00830+K00814+K14454+K01755+K01939+K00272
Mucin type O-Glycan biosynthesis	ko00512	9	ENSBTAG00000001998;ENSBTAG00000004870;ENSBTAG00000005644;ENSBTAG00000008718;ENSBTAG00000009443;ENSBTAG00000012626;ENSBTAG00000017376;ENSBTAG00000034113;ENSBTAG00000046156;	K03479+K00710+K00710+K00710+K09662+K09905+K00710+K00710+K03368
Glycosaminoglycan biosynthesis - heparan sulfate	ko00534	9	ENSBTAG00000005523;ENSBTAG00000006157;ENSBTAG00000007866;ENSBTAG00000008844;ENSBTAG00000009298;ENSBTAG00000019644;ENSBTAG00000020817;ENSBTAG00000037523;ENSBTAG00000047881;	K00771+K02514+K07809+K02370+K00771+K02367+K10157+K00734+K08103
Arachidonic acid metabolism	ko00590	9	ENSBTAG00000008779;ENSBTAG00000009737;ENSBTAG00000011990;ENSBTAG00000013301;ENSBTAG00000016218;ENSBTAG00000016415;ENSBTAG00000020319;ENSBTAG00000021933;ENSBTAG00000031933;	K08022+K00807+K00460+K00681+K05309+K01254+K00461+K00458+K00460
Drug metabolism - cytochrome P450	ko00982	9	ENSBTAG00000000085;ENSBTAG00000003548;ENSBTAG00000009125;ENSBTAG00000009725;ENSBTAG00000013093;ENSBTAG00000021113;ENSBTAG00000026501;ENSBTAG00000026502;ENSBTAG00000026812;	K07409+K00799+K00129+K00157+K00129+K00129+K07414+K07414+K00157
Biosynthesis of unsaturated fatty acids	ko01040	9	ENSBTAG00000002843;ENSBTAG00000010270;ENSBTAG00000012632;ENSBTAG00000015505;ENSBTAG00000022294;ENSBTAG00000022449;ENSBTAG00000023607;ENSBTAG00000033089;ENSBTAG00000046814;	K01068+K01068+K10258+K10226+K10224+K00507+K10703+K10703+K01068
Basal transcription factors	ko03022	9	ENSBTAG00000000694;ENSBTAG00000002072;ENSBTAG00000004257;ENSBTAG00000006212;ENSBTAG00000009484;ENSBTAG00000009709;ENSBTAG00000011339;ENSBTAG00000021016;ENSBTAG00000034332;	K03134+K10844+K03129+K03121+K03131+K03130+K14649+K03138+K03139
DNA replication	ko03030	9	ENSBTAG00000000590;ENSBTAG00000009661;ENSBTAG00000009711;ENSBTAG00000011083;ENSBTAG00000012241;ENSBTAG00000017951;ENSBTAG00000018589;ENSBTAG00000030965;ENSBTAG00000046325;	K02324+K10743+K07466+K02327+K02328+K03505+K10755+K02210+K02212
Carbohydrate digestion and absorption	ko04973	9	ENSBTAG00000002350;ENSBTAG00000005978;ENSBTAG00000008077;ENSBTAG00000013108;ENSBTAG00000013680;ENSBTAG00000014898;ENSBTAG00000015246;ENSBTAG00000017636;ENSBTAG00000018635;	K02649+K02649+K08171+K00844+K01540+K00844+K04625+K04456+K01539
Mineral absorption	ko04978	9	ENSBTAG00000001382;ENSBTAG00000004629;ENSBTAG00000007898;ENSBTAG00000012284;ENSBTAG00000013680;ENSBTAG00000018635;ENSBTAG00000033076;ENSBTAG00000046026;ENSBTAG00000047416;	K14706+K12040+K08370+K05011+K01540+K01539+K04981+K14710+K14735
Prion diseases	ko05020	9	ENSBTAG00000007153;ENSBTAG00000010069;ENSBTAG00000010520;ENSBTAG00000011193;ENSBTAG00000011851;ENSBTAG00000011966;ENSBTAG00000014367;ENSBTAG00000016156;ENSBTAG00000022799;	K03986+K09203+K03999+K03988+K05703+K05635+K04345+K04371+K02599
African trypanosomiasis	ko05143	9	ENSBTAG00000000563;ENSBTAG00000010303;ENSBTAG00000012510;ENSBTAG00000013550;ENSBTAG00000018198;ENSBTAG00000019079;ENSBTAG00000020446;ENSBTAG00000020921;ENSBTAG00000025471;	K04729+K06490+K05858+K02677+K10161+K05858+K01392+K02677+K03156
Phenylalanine metabolism	ko00360	8	ENSBTAG00000001041;ENSBTAG00000005766;ENSBTAG00000009125;ENSBTAG00000011960;ENSBTAG00000013093;ENSBTAG00000021113;ENSBTAG00000030334;ENSBTAG00000046264;	K00276+K03334+K00129+K14454+K00129+K00129+K00276+K00276
Glutathione metabolism	ko00480	8	ENSBTAG00000003548;ENSBTAG00000005989;ENSBTAG00000007842;ENSBTAG00000013301;ENSBTAG00000015571;ENSBTAG00000016881;ENSBTAG00000017281;ENSBTAG00000019512;	K00799+K11142+K11205+K00681+K11204+K11140+K01469+K00036
Pyruvate metabolism	ko00620	8	ENSBTAG00000002481;ENSBTAG00000006779;ENSBTAG00000008743;ENSBTAG00000011934;ENSBTAG00000013303;ENSBTAG00000017056;ENSBTAG00000019700;ENSBTAG00000038327;	K01069+K00102+K00128+K01596+K01895+K12406+K01958+K00627
Nicotinate and nicotinamide metabolism	ko00760	8	ENSBTAG00000002983;ENSBTAG00000005270;ENSBTAG00000006156;ENSBTAG00000009725;ENSBTAG00000011527;ENSBTAG00000018082;ENSBTAG00000026812;ENSBTAG00000030820;	K01081+K01081+K01242+K00157+K01081+K00767+K00157+K01081
Regulation of autophagy	ko04140	8	ENSBTAG00000009084;ENSBTAG00000010727;ENSBTAG00000012987;ENSBTAG00000025928;ENSBTAG00000030977;ENSBTAG00000039963;ENSBTAG00000046427;ENSBTAG00000047782;	K08343+K08342+K08269+K05414+K08269+K05414+K05414+K05414
Citrate cycle (TCA cycle)	ko00020	7	ENSBTAG00000006029;ENSBTAG00000006463;ENSBTAG00000011934;ENSBTAG00000019700;ENSBTAG00000021728;ENSBTAG00000038327;ENSBTAG00000046019;	K00164+K00658+K01596+K01958+K00164+K00627+K00234
Cysteine and methionine metabolism	ko00270	7	ENSBTAG00000002524;ENSBTAG00000005766;ENSBTAG00000005963;ENSBTAG00000011960;ENSBTAG00000014882;ENSBTAG00000020873;ENSBTAG00000021143;	K08963+K03334+K00789+K14454+K00558+K00789+K00558
Other glycan degradation	ko00511	7	ENSBTAG00000001752;ENSBTAG00000005674;ENSBTAG00000006277;ENSBTAG00000006508;ENSBTAG00000014833;ENSBTAG00000015512;ENSBTAG00000027825;	K01206+K01186+K01227+K12312+K12357+K12373+K12312
Glycosaminoglycan biosynthesis - keratan sulfate	ko00533	7	ENSBTAG00000003721;ENSBTAG00000015249;ENSBTAG00000016968;ENSBTAG00000021897;ENSBTAG00000022238;ENSBTAG00000040000;ENSBTAG00000046156;	K01022+K07966+K04746+K07968+K00741+K09671+K03368
Glycosphingolipid biosynthesis - lacto and neolacto series	ko00601	7	ENSBTAG00000004197;ENSBTAG00000014514;ENSBTAG00000015249;ENSBTAG00000021897;ENSBTAG00000022238;ENSBTAG00000038062;ENSBTAG00000046516;	K07971+K00718+K07966+K07968+K00741+K07632+K07635
One carbon pool by folate	ko00670	7	ENSBTAG00000012446;ENSBTAG00000014470;ENSBTAG00000017094;ENSBTAG00000020023;ENSBTAG00000020698;ENSBTAG00000021630;ENSBTAG00000031500;	K01934+K00289+K00600+K01934+K00297+K00604+K00600
Homologous recombination	ko03440	7	ENSBTAG00000005225;ENSBTAG00000009711;ENSBTAG00000009966;ENSBTAG00000011083;ENSBTAG00000012241;ENSBTAG00000017951;ENSBTAG00000021456;	K10873+K07466+K10880+K02327+K02328+K03505+K08991
Intestinal immune network for IgA production	ko04672	7	ENSBTAG00000000130;ENSBTAG00000002259;ENSBTAG00000007084;ENSBTAG00000019095;ENSBTAG00000026489;ENSBTAG00000034609;ENSBTAG00000045907;	K05475+K10785+K04466+K04185+K05151+K10785+K05476
Taste transduction	ko04742	7	ENSBTAG00000005464;ENSBTAG00000007882;ENSBTAG00000014367;ENSBTAG00000014828;ENSBTAG00000015246;ENSBTAG00000016734;ENSBTAG00000046662;	K08046+K04849+K04345+K04344+K04625+K04624+K04980
Type I diabetes mellitus	ko04940	7	ENSBTAG00000000016;ENSBTAG00000001008;ENSBTAG00000002069;ENSBTAG00000002259;ENSBTAG00000020116;ENSBTAG00000025471;ENSBTAG00000034609;	K05468+K07818+K06751+K10785+K06751+K03156+K10785
Galactose metabolism	ko00052	6	ENSBTAG00000000286;ENSBTAG00000002683;ENSBTAG00000013108;ENSBTAG00000014898;ENSBTAG00000015249;ENSBTAG00000032288;	K00850+K00850+K00844+K00844+K07966+K12407
beta-Alanine metabolism	ko00410	6	ENSBTAG00000001041;ENSBTAG00000004248;ENSBTAG00000008743;ENSBTAG00000019625;ENSBTAG00000030334;ENSBTAG00000046264;	K00276+K01578+K00128+K07514+K00276+K00276
Allograft rejection	ko05330	6	ENSBTAG00000001008;ENSBTAG00000002069;ENSBTAG00000002259;ENSBTAG00000020116;ENSBTAG00000025471;ENSBTAG00000034609;	K07818+K06751+K10785+K06751+K03156+K10785
Graft-versus-host disease	ko05332	6	ENSBTAG00000001008;ENSBTAG00000002069;ENSBTAG00000002259;ENSBTAG00000020116;ENSBTAG00000025471;ENSBTAG00000034609;	K07818+K06751+K10785+K06751+K03156+K10785
Pentose phosphate pathway	ko00030	5	ENSBTAG00000000286;ENSBTAG00000002683;ENSBTAG00000004246;ENSBTAG00000019512;ENSBTAG00000031332;	K00850+K00850+K13937+K00036+K00852
Fatty acid metabolism	ko00071	5	ENSBTAG00000002049;ENSBTAG00000008743;ENSBTAG00000009965;ENSBTAG00000014649;ENSBTAG00000019625;	K00022+K00128+K13238+K08766+K07514
Steroid hormone biosynthesis	ko00140	5	ENSBTAG00000005287;ENSBTAG00000005976;ENSBTAG00000011720;ENSBTAG00000020789;ENSBTAG00000037824;	K00489+K13373+K13369+K01131+K00497
Histidine metabolism	ko00340	5	ENSBTAG00000008743;ENSBTAG00000009125;ENSBTAG00000009911;ENSBTAG00000013093;ENSBTAG00000021113;	K00128+K00129+K01590+K00129+K00129
Selenocompound metabolism	ko00450	5	ENSBTAG00000002056;ENSBTAG00000011795;ENSBTAG00000017826;ENSBTAG00000018405;ENSBTAG00000043581;	K01874+K00384+K01763+K01874+K00384
Glycosphingolipid biosynthesis - ganglio series	ko00604	5	ENSBTAG00000001770;ENSBTAG00000007309;ENSBTAG00000015512;ENSBTAG00000046156;ENSBTAG00000046548;	K03369+K03375+K12373+K03368+K03374
Propanoate metabolism	ko00640	5	ENSBTAG00000004248;ENSBTAG00000008743;ENSBTAG00000013303;ENSBTAG00000018469;ENSBTAG00000019625;	K01578+K00128+K01895+K00140+K07514
Metabolism of xenobiotics by cytochrome P450	ko00980	5	ENSBTAG00000000085;ENSBTAG00000003548;ENSBTAG00000009125;ENSBTAG00000013093;ENSBTAG00000021113;	K07409+K00799+K00129+K00129+K00129
Mismatch repair	ko03430	5	ENSBTAG00000009711;ENSBTAG00000011083;ENSBTAG00000012241;ENSBTAG00000017951;ENSBTAG00000018589;	K07466+K02327+K02328+K03505+K10755
Renin-angiotensin system	ko04614	5	ENSBTAG00000016881;ENSBTAG00000020446;ENSBTAG00000021333;ENSBTAG00000027337;ENSBTAG00000034402;	K11140+K01392+K01380+K13289+K09708
Phototransduction	ko04744	5	ENSBTAG00000008773;ENSBTAG00000017480;ENSBTAG00000019963;ENSBTAG00000027438;ENSBTAG00000035587;	K12321+K13756+K00909+K12321+K04439
Vitamin digestion and absorption	ko04977	5	ENSBTAG00000008505;ENSBTAG00000012281;ENSBTAG00000016164;ENSBTAG00000021090;ENSBTAG00000024162;	K14462+K11156+K14617+K05665+K14609
Starch and sucrose metabolism	ko00500	4	ENSBTAG00000013108;ENSBTAG00000014898;ENSBTAG00000016202;ENSBTAG00000032288;	K00844+K00844+K01194+K12407
Glycosaminoglycan degradation	ko00531	4	ENSBTAG00000004640;ENSBTAG00000005745;ENSBTAG00000015512;ENSBTAG00000047956;	K01197+K07964+K12373+K01205
Ribosome	ko03010	4	ENSBTAG00000006487;ENSBTAG00000009535;ENSBTAG00000015283;ENSBTAG00000016224;	K02997+K02981+K02912+K02993
Proteasome	ko03050	4	ENSBTAG00000012728;ENSBTAG00000015112;ENSBTAG00000018040;ENSBTAG00000021461;	K11598+K03037+K02733+K03033
Circadian rhythm - mammal	ko04710	4	ENSBTAG00000001879;ENSBTAG00000003889;ENSBTAG00000010149;ENSBTAG00000021223;	K02633+K02633+K02295+K02295
Proximal tubule bicarbonate reclamation	ko04964	4	ENSBTAG00000004629;ENSBTAG00000011934;ENSBTAG00000013680;ENSBTAG00000018635;	K12040+K01596+K01540+K01539
Collecting duct acid secretion	ko04966	4	ENSBTAG00000001610;ENSBTAG00000008777;ENSBTAG00000019961;ENSBTAG00000034674;	K06573+K01542+K01543+K05018
Fat digestion and absorption	ko04975	4	ENSBTAG00000000765;ENSBTAG00000004442;ENSBTAG00000007486;ENSBTAG00000008505;	K14075+K13509+K12298+K14462
Asthma	ko05310	4	ENSBTAG00000002259;ENSBTAG00000024503;ENSBTAG00000025471;ENSBTAG00000034609;	K10785+K07983+K03156+K10785
Steroid biosynthesis	ko00100	3	ENSBTAG00000005976;ENSBTAG00000007486;ENSBTAG00000018936;	K13373+K12298+K01852
Cyanoamino acid metabolism	ko00460	3	ENSBTAG00000013301;ENSBTAG00000017094;ENSBTAG00000031500;	K00681+K00600+K00600
Butirosin and neomycin biosynthesis	ko00524	3	ENSBTAG00000013108;ENSBTAG00000014898;ENSBTAG00000032288;	K00844+K00844+K12407
Linoleic acid metabolism	ko00591	3	ENSBTAG00000000085;ENSBTAG00000011990;ENSBTAG00000031933;	K07409+K00460+K00460
Glycosphingolipid biosynthesis - globo series	ko00603	3	ENSBTAG00000014514;ENSBTAG00000015512;ENSBTAG00000046156;	K00718+K12373+K03368
Riboflavin metabolism	ko00740	3	ENSBTAG00000000186;ENSBTAG00000015115;ENSBTAG00000019345;	K00953+K14410+K00861
Vitamin B6 metabolism	ko00750	3	ENSBTAG00000009725;ENSBTAG00000013960;ENSBTAG00000026812;	K00157+K00831+K00157
Pantothenate and CoA biosynthesis	ko00770	3	ENSBTAG00000002479;ENSBTAG00000007920;ENSBTAG00000010442;	K09680+K09680+K09680
Retinol metabolism	ko00830	3	ENSBTAG00000000085;ENSBTAG00000010188;ENSBTAG00000012281;	K07409+K11150+K11156
Terpenoid backbone biosynthesis	ko00900	3	ENSBTAG00000004075;ENSBTAG00000006529;ENSBTAG00000017819;	K01823+K12504+K13273
Drug metabolism - other enzymes	ko00983	3	ENSBTAG00000005152;ENSBTAG00000011164;ENSBTAG00000013727;	K00857+K01044+K13421
Sulfur relay system	ko04122	3	ENSBTAG00000005595;ENSBTAG00000006962;ENSBTAG00000007722;	K00566+K04487+K11996
Primary bile acid biosynthesis	ko00120	2	ENSBTAG00000005287;ENSBTAG00000015164;	K00489+K08748
Phenylalanine, tyrosine and tryptophan biosynthesis	ko00400	2	ENSBTAG00000005766;ENSBTAG00000011960;	K03334+K14454
Glycosylphosphatidylinositol(GPI)-anchor biosynthesis	ko00563	2	ENSBTAG00000011659;ENSBTAG00000016594;	K08098+K03860
Butanoate metabolism	ko00650	2	ENSBTAG00000002049;ENSBTAG00000019625;	K00022+K07514
Thiamine metabolism	ko00730	2	ENSBTAG00000006962;ENSBTAG00000007097;	K04487+K05307
Folate biosynthesis	ko00790	2	ENSBTAG00000008994;ENSBTAG00000021961;	K01930+K00072
Porphyrin and chlorophyll metabolism	ko00860	2	ENSBTAG00000004124;ENSBTAG00000015294;	K00228+K02257
RNA polymerase	ko03020	2	ENSBTAG00000006481;ENSBTAG00000018044;	K02999+K14721
Non-homologous end-joining	ko03450	2	ENSBTAG00000003576;ENSBTAG00000017019;	K03512+K06642
SNARE interactions in vesicular transport	ko04130	2	ENSBTAG00000007712;ENSBTAG00000020760;	K08517+K08509
Pentose and glucuronate interconversions	ko00040	1	ENSBTAG00000008743;	K00128
Ascorbate and aldarate metabolism	ko00053	1	ENSBTAG00000008743;	K00128
Fatty acid biosynthesis	ko00061	1	ENSBTAG00000015980;	K00665
Fatty acid elongation in mitochondria	ko00062	1	ENSBTAG00000002049;	K00022
Caffeine metabolism	ko00232	1	ENSBTAG00000000085;	K07409
Valine, leucine and isoleucine biosynthesis	ko00290	1	ENSBTAG00000010698;	K01873
Taurine and hypotaurine metabolism	ko00430	1	ENSBTAG00000013301;	K00681
D-Arginine and D-ornithine metabolism	ko00472	1	ENSBTAG00000018831;	K00273
alpha-Linolenic acid metabolism	ko00592	1	ENSBTAG00000015505;	K10226
Glyoxylate and dicarboxylate metabolism	ko00630	1	ENSBTAG00000005583;	K01816
Nitrogen metabolism	ko00910	1	ENSBTAG00000011420;	K01672
